# Supplementary material for: Synthesis of sulfur-containing benzo[b]pyrrolo[2,1-c][1,4]oxazine-3,9-diones: blue light promoted radical cyclization process
Source: Royal Society of Chemistry journal article supplement (doi:10.1039/d3ra02247a), 2023-01-01

# Supporting Information for

## Synthesis of Sulfur-Containing Benzo[*b*]pyrrolo[2,1-*c*][1,4]oxazine-3,9-diones: Blue Light Promoted Radical Cyclization Process

Feng pan,<sup>a,c,#</sup> Haohu Li,<sup>a,#</sup> Xiaohua Wang,<sup>d,#</sup> Liwen Luo,<sup>a</sup> Yanfei Lin,<sup>b,\*</sup> Qingkai Yu,<sup>a</sup> Wenlin Xie,<sup>c,\*</sup> and Lianpeng Zhang<sup>a,\*</sup>

<sup>a</sup> Yunnan Provincial Key Laboratory of Wood Adhesives and Glued Products, Southwest Forestry University, Kunming 650224, Yunnan, China.

<sup>b</sup> College of Biological, Chemical Sciences and Engineering, Jiaxing University, Jiaxing 314001, Zhejiang, China.

<sup>c</sup> School of Chemistry and Chemical Engineering, Hunan University of Science and Technology, Xiangtan 411201, Hunan, China.

<sup>d</sup> Tongji Zhejiang College, Jiaxing 314051, China.

# These authors contributed equally to this work.

*E-mail:* lpz@zju.edu.cn (L. Zhang);

xwl2000zsu@163.com (W. Xie);

11219008@zju.edu.cn (Y. Lin)

|                                                                                     |        |
|-------------------------------------------------------------------------------------|--------|
| 1. The details information of the crystal of <b>3k</b> .....                        | S3-S6  |
| 2. Copies of the Products $^1\text{H}$ NMR, $^{13}\text{C}\{^1\text{H}\}$ NMR ..... | S7-S27 |

# 1. The details information of the crystal of 3k

## checkCIF/PLATON report

Structure factors have been supplied for datablock(s) 20210608

THIS REPORT IS FOR GUIDANCE ONLY. IF USED AS PART OF A REVIEW PROCEDURE FOR PUBLICATION, IT SHOULD NOT REPLACE THE EXPERTISE OF AN EXPERIENCED CRYSTALLOGRAPHIC REFEREE.

No syntax errors found. CIF dictionary Interpreting this report

### Datablock: 20210608

---

Bond precision: C-C = 0.0066 Å Wavelength=0.71073

Cell: a=9.3901(8) b=15.1733(8) c=16.2514(7)  
alpha=73.186(4) beta=77.982(5) gamma=87.462(5)

Temperature: 293 K

|                        | Calculated        | Reported          |
|------------------------|-------------------|-------------------|
| Volume                 | 2167.6(2)         | 2167.6(2)         |
| Space group            | P -1              | P -1              |
| Hall group             | -P 1              | -P 1              |
| Moiety formula         | C24 H20 Br N O3 S | C24 H20 Br N O3 S |
| Sum formula            | C24 H20 Br N O3 S | C24 H20 Br N O3 S |
| Mr                     | 482.37            | 482.38            |
| Dx, g cm <sup>-3</sup> | 1.478             | 1.478             |
| Z                      | 4                 | 4                 |
| Mu (mm <sup>-1</sup> ) | 2.018             | 2.018             |
| F000                   | 984.0             | 984.0             |
| F000'                  | 983.73            |                   |
| h, k, lmax             | 11, 18, 19        | 11, 18, 19        |
| Nref                   | 7637              | 7620              |
| Tmin, Tmax             | 0.817, 0.817      | 0.516, 1.000      |
| Tmin'                  | 0.817             |                   |

Correction method= # Reported T Limits: Tmin=0.516 Tmax=1.000  
AbsCorr = MULTI-SCAN

Data completeness= 0.998 Theta(max)= 25.000

R(reflections)= 0.0507( 4496) wR2(reflections)=  
S = 0.944 Npar= 543 0.1053( 7620)

---

The following ALERTS were generated. Each ALERT has the format  
**test-name\_ALERT\_alert-type\_alert-level.**  
Click on the hyperlinks for more details of the test.

---

**Alert level B**

PLAT910\_ALERT\_3\_B Missing # of FCF Reflection(s) Below Theta (Min). 17 Note

**Author Response: Theta min = 3.11 deg. The theta value of the missing reflections are less than 3.11 deg. and therefore reflections were excluded.**

---

**Alert level C**

PLAT230\_ALERT\_2\_C Hirshfeld Test Diff for O4 --C23 . 5.3 s.u.  
PLAT230\_ALERT\_2\_C Hirshfeld Test Diff for C12 --C17 . 6.0 s.u.  
PLAT241\_ALERT\_2\_C High 'MainMol' Ueq as Compared to Neighbors of S4 Check  
PLAT241\_ALERT\_2\_C High 'MainMol' Ueq as Compared to Neighbors of S3 Check  
PLAT242\_ALERT\_2\_C Low 'MainMol' Ueq as Compared to Neighbors of C30 Check  
PLAT334\_ALERT\_2\_C Small Aver. Benzene C-C Dist C30 -C52 1.37 Ang.  
PLAT334\_ALERT\_2\_C Small Aver. Benzene C-C Dist C15 -C22 1.37 Ang.  
PLAT341\_ALERT\_3\_C Low Bond Precision on C-C Bonds ..... 0.0066 Ang.  
PLAT790\_ALERT\_4\_C Centre of Gravity not Within Unit Cell: Resd. # 1 Note  
C24 H20 Br N O3 S  
PLAT906\_ALERT\_3\_C Large K Value in the Analysis of Variance ..... 5.682 Check

---

**Alert level G**

PLAT005\_ALERT\_5\_G No Embedded Refinement Details Found in the CIF Please Do !  
PLAT199\_ALERT\_1\_G Reported \_cell\_measurement\_temperature .... (K) 293 Check  
PLAT200\_ALERT\_1\_G Reported \_diffn\_ambient\_temperature .... (K) 293 Check  
PLAT790\_ALERT\_4\_G Centre of Gravity not Within Unit Cell: Resd. # 2 Note  
C24 H20 Br N O3 S  
PLAT793\_ALERT\_4\_G Model has Chirality at C6 (Centro SPGR) S Verify  
PLAT793\_ALERT\_4\_G Model has Chirality at C14 (Centro SPGR) S Verify  
PLAT793\_ALERT\_4\_G Model has Chirality at C27 (Centro SPGR) R Verify  
PLAT793\_ALERT\_4\_G Model has Chirality at C31 (Centro SPGR) R Verify  
PLAT961\_ALERT\_5\_G Dataset Contains no Negative Intensities ..... Please Check  
PLAT978\_ALERT\_2\_G Number C-C Bonds with Positive Residual Density. 0 Info

---

0 **ALERT level A** = Most likely a serious problem - resolve or explain  
1 **ALERT level B** = A potentially serious problem, consider carefully  
10 **ALERT level C** = Check. Ensure it is not caused by an omission or oversight  
10 **ALERT level G** = General information/check it is not something unexpected

2 ALERT type 1 CIF construction/syntax error, inconsistent or missing data  
8 ALERT type 2 Indicator that the structure model may be wrong or deficient  
3 ALERT type 3 Indicator that the structure quality may be low  
6 ALERT type 4 Improvement, methodology, query or suggestion  
2 ALERT type 5 Informative message, check

---

It is advisable to attempt to resolve as many as possible of the alerts in all categories. Often the minor alerts point to easily fixed oversights, errors and omissions in your CIF or refinement strategy, so attention to these fine details can be worthwhile. In order to resolve some of the more serious problems it may be necessary to carry out additional measurements or structure refinements. However, the purpose of your study may justify the reported deviations and the more serious of these should normally be commented upon in the discussion or experimental section of a paper or in the "special\_details" fields of the CIF. checkCIF was carefully designed to identify outliers and unusual parameters, but every test has its limitations and alerts that are not important in a particular case may appear. Conversely, the absence of alerts does not guarantee there are no aspects of the results needing attention. It is up to the individual to critically assess their own results and, if necessary, seek expert advice.

#### **Publication of your CIF in IUCr journals**

A basic structural check has been run on your CIF. These basic checks will be run on all CIFs submitted for publication in IUCr journals (*Acta Crystallographica*, *Journal of Applied Crystallography*, *Journal of Synchrotron Radiation*); however, if you intend to submit to *Acta Crystallographica Section C* or *E* or *IUCrData*, you should make sure that [full publication checks](#) are run on the final version of your CIF prior to submission.

#### **Publication of your CIF in other journals**

Please refer to the *Notes for Authors* of the relevant journal for any special instructions relating to CIF submission.

---

**PLATON version of 13/07/2021; check.def file version of 13/07/2021**

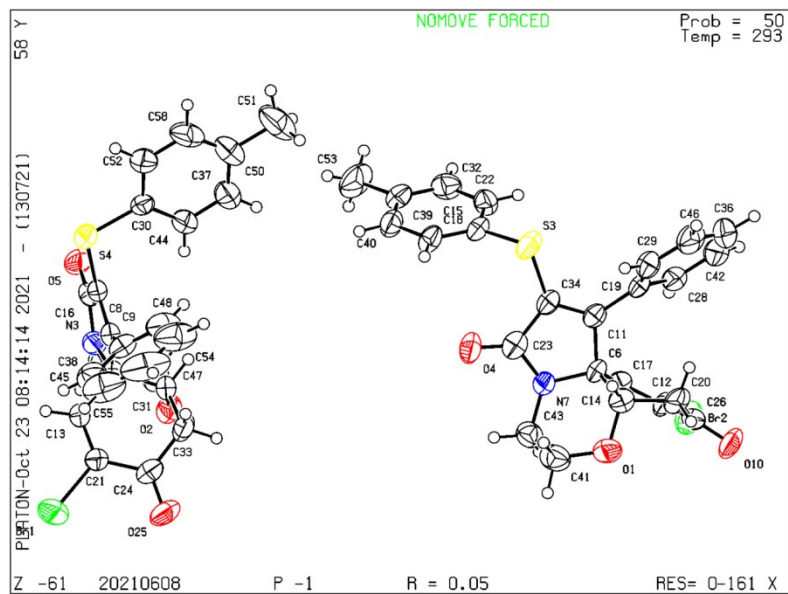

## 2. Copies of the Products $^1\text{H}$ NMR, $^{13}\text{C}\{^1\text{H}\}$ NMR

**Figure S1**  $^1\text{H}$ -NMR spectrum (400 MHz,  $\text{CDCl}_3$ ) of **3a**

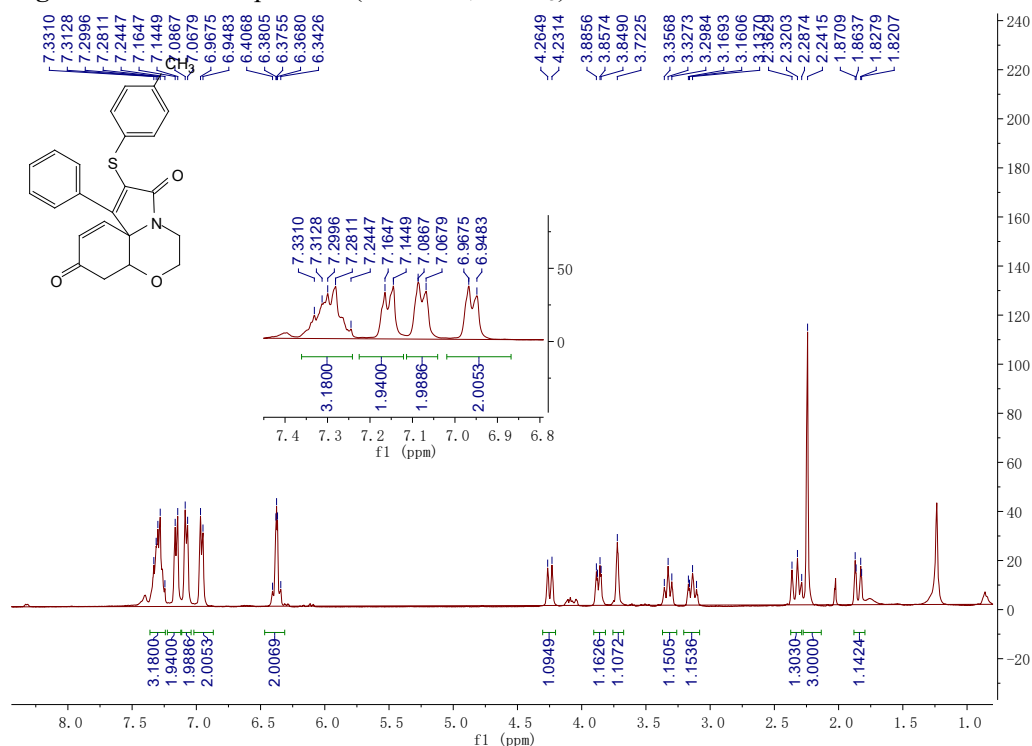

**Figure S2**  $^{13}\text{C}\{^1\text{H}\}$ -NMR spectrum (100 MHz,  $\text{CDCl}_3$ ) of **3a**

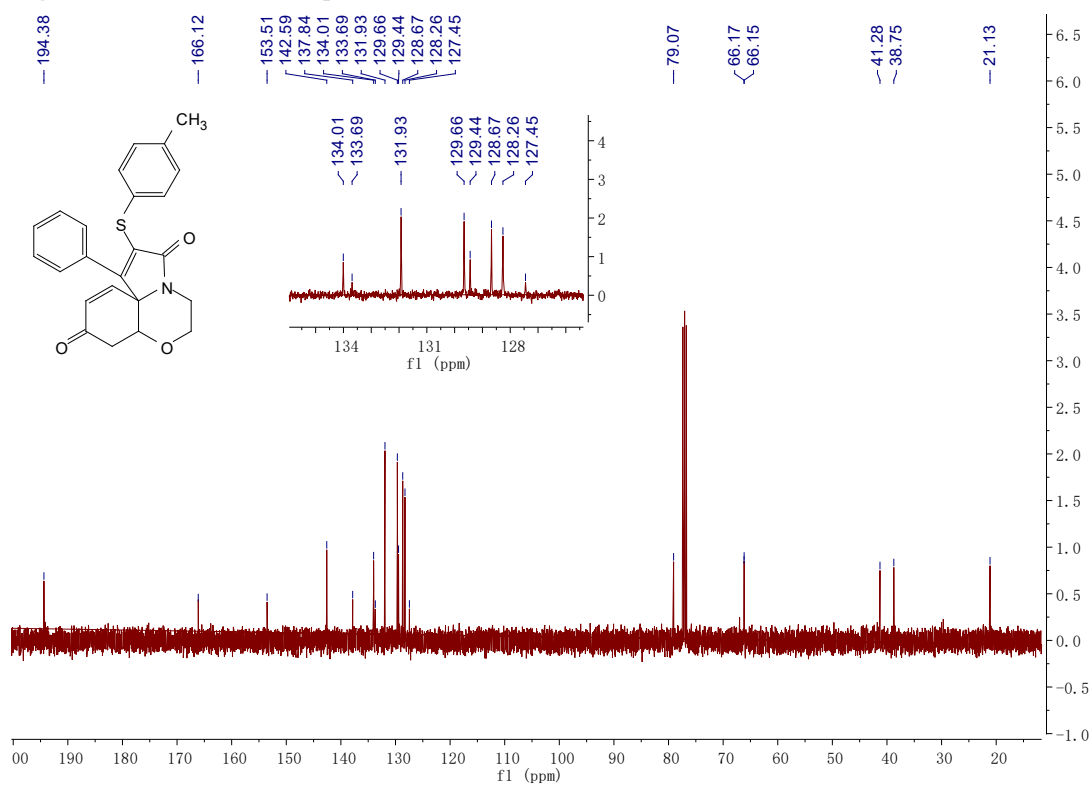

**Figure S3**  $^1\text{H-NMR}$  spectrum (400 MHz,  $\text{CDCl}_3$ ) of **3b**

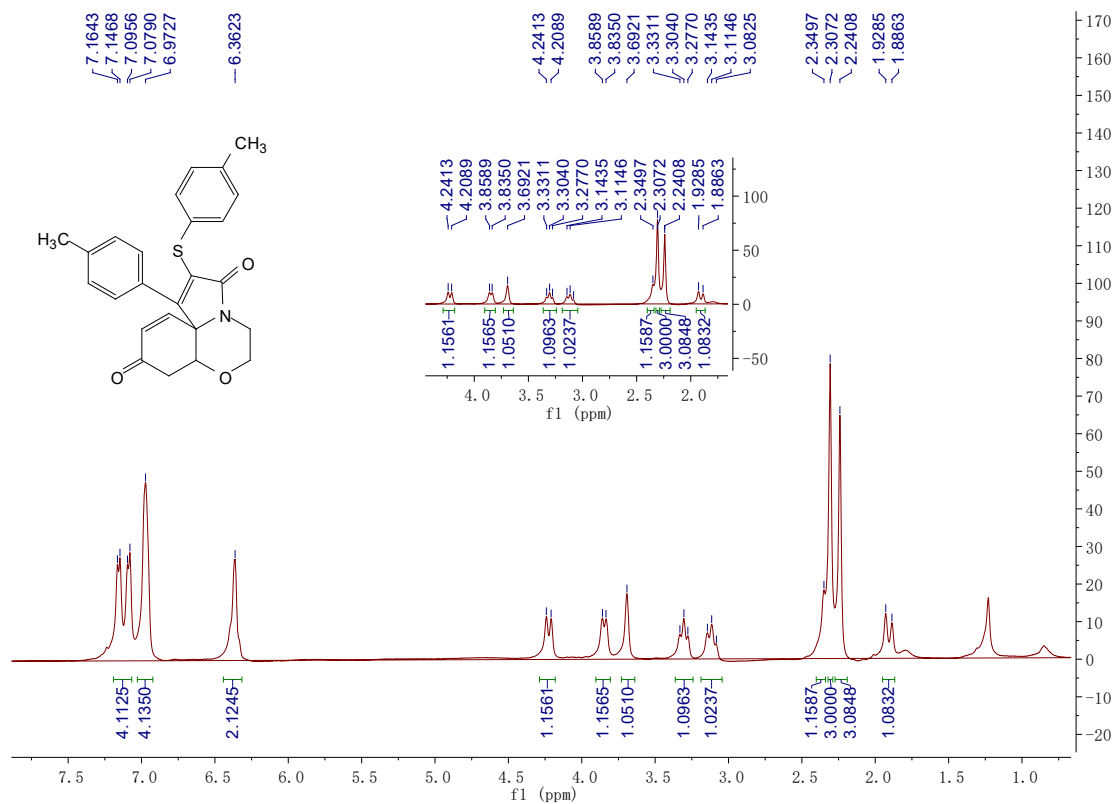

**Figure S4**  $^{13}\text{C}\{^1\text{H}\}$ -NMR spectrum (100 MHz,  $\text{CDCl}_3$ ) of **3b**

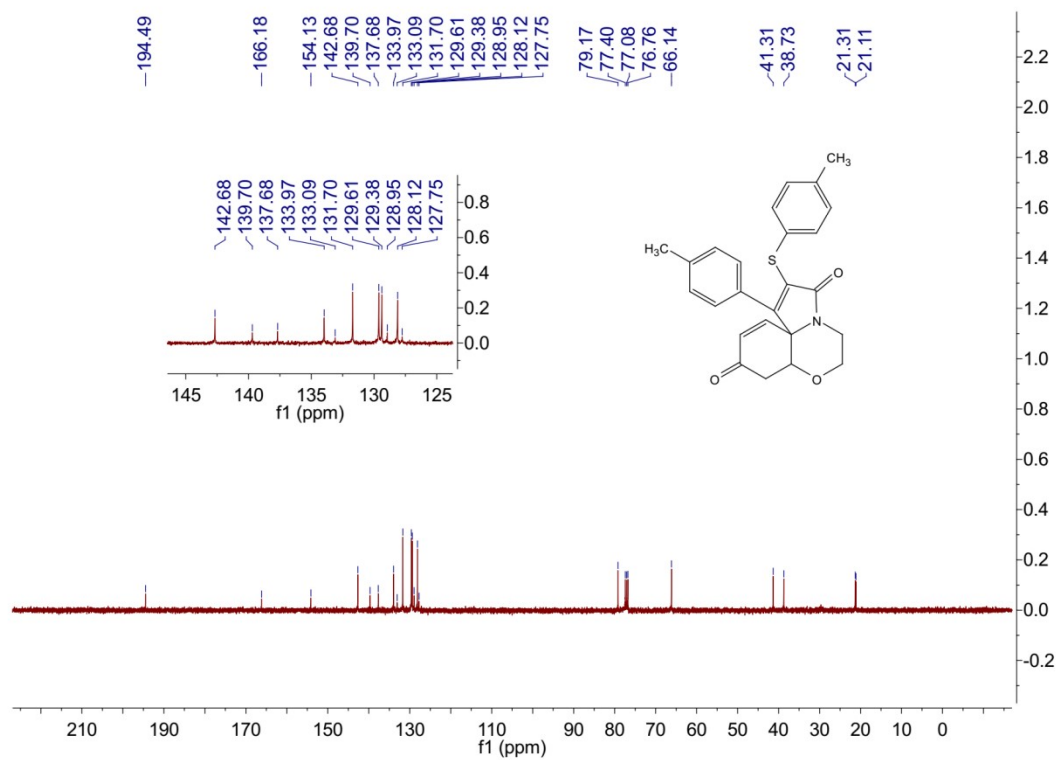



Figure S5  $^1\text{H-NMR}$  spectrum (400 MHz,  $\text{CDCl}_3$ ) of **3c**

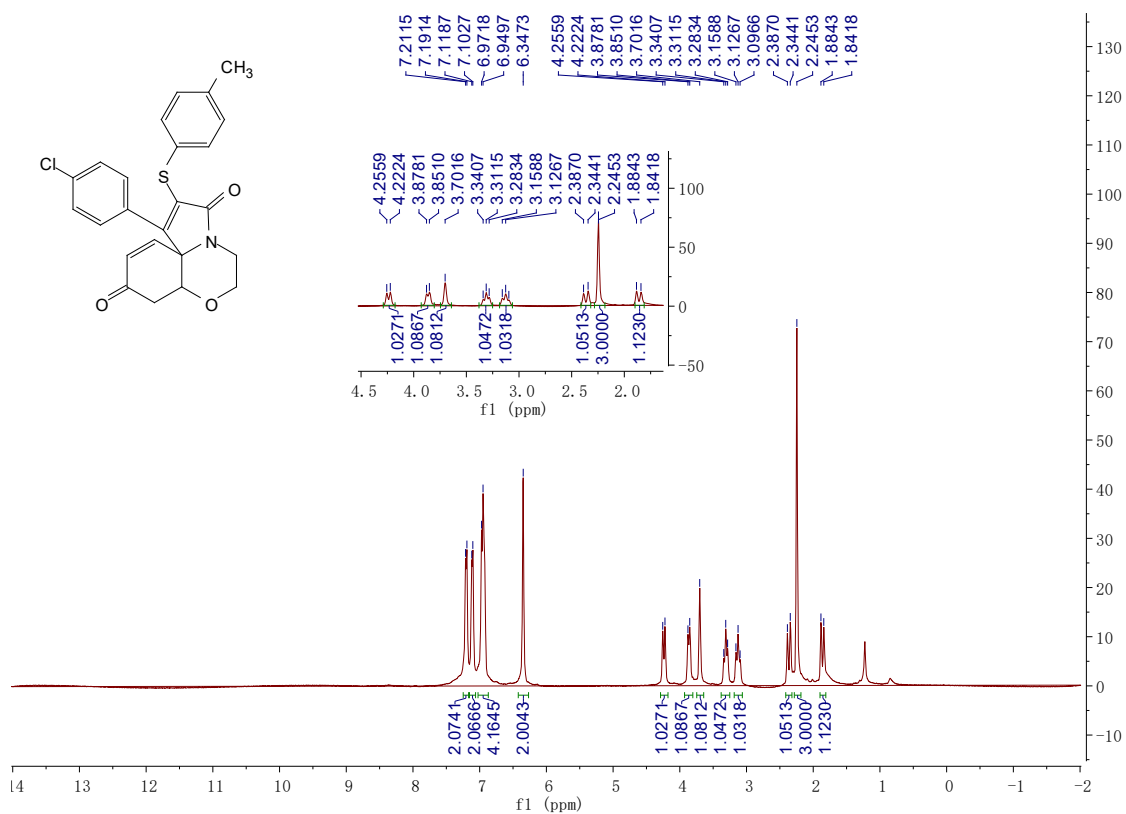

Figure S6  $^{13}\text{C}\{^1\text{H}\}$ -NMR spectrum (100 MHz,  $\text{CDCl}_3$ ) of **3c**

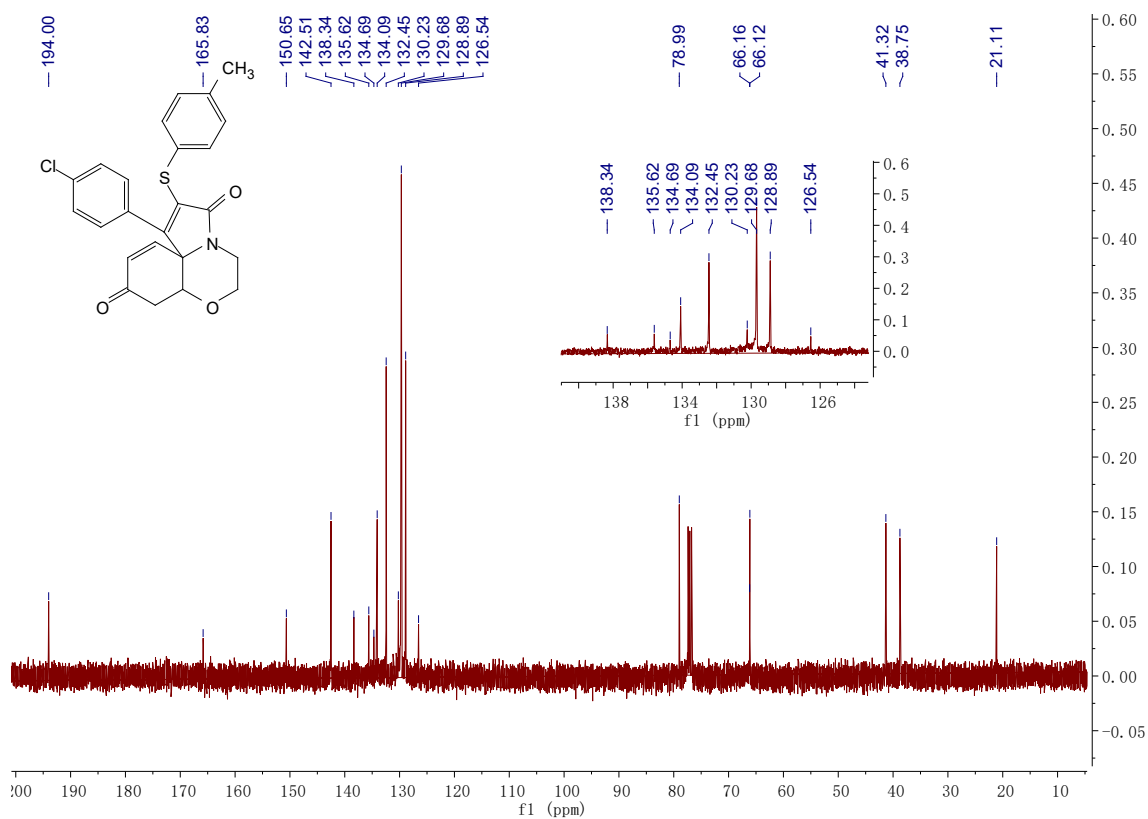



**Figure S9**  $^1\text{H-NMR}$  spectrum (400 MHz,  $\text{CDCl}_3$ ) of **3e**

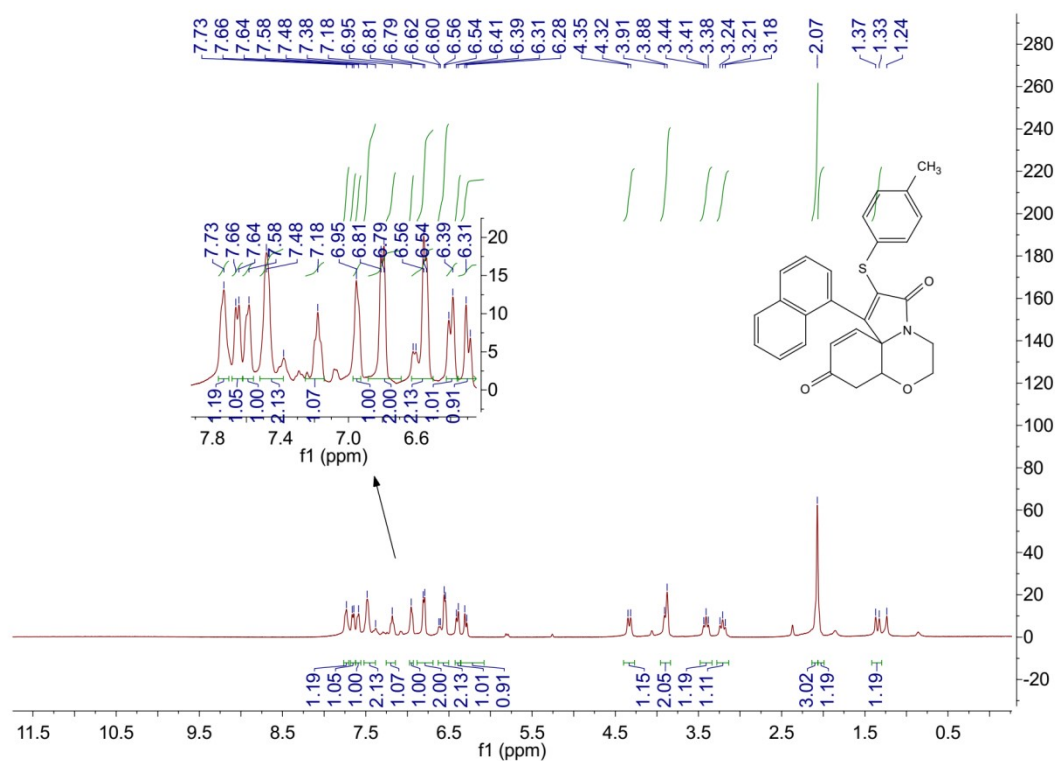

**Figure S10**  $^{13}\text{C}\{^1\text{H}\}$ -NMR spectrum (100 MHz,  $\text{CDCl}_3$ ) of **3e**

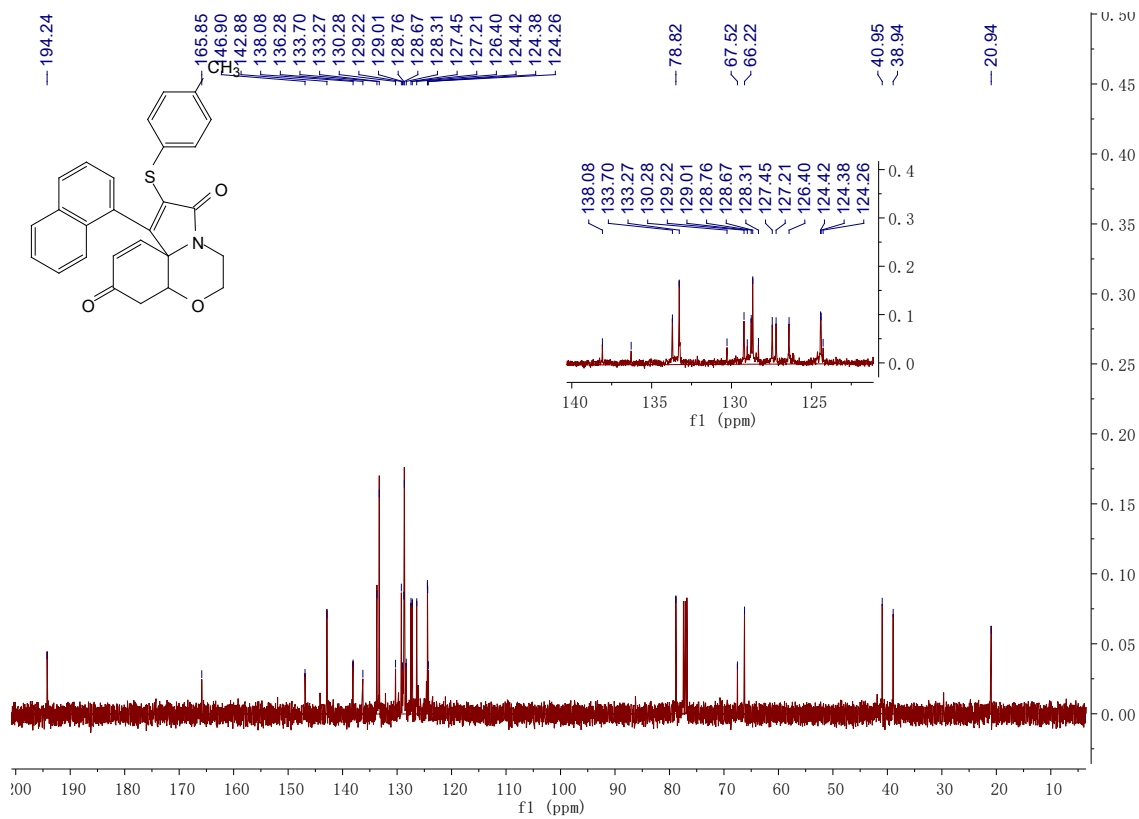

Figure S11  $^1\text{H}$ -NMR spectrum (400 MHz,  $\text{CDCl}_3$ ) of **3f**

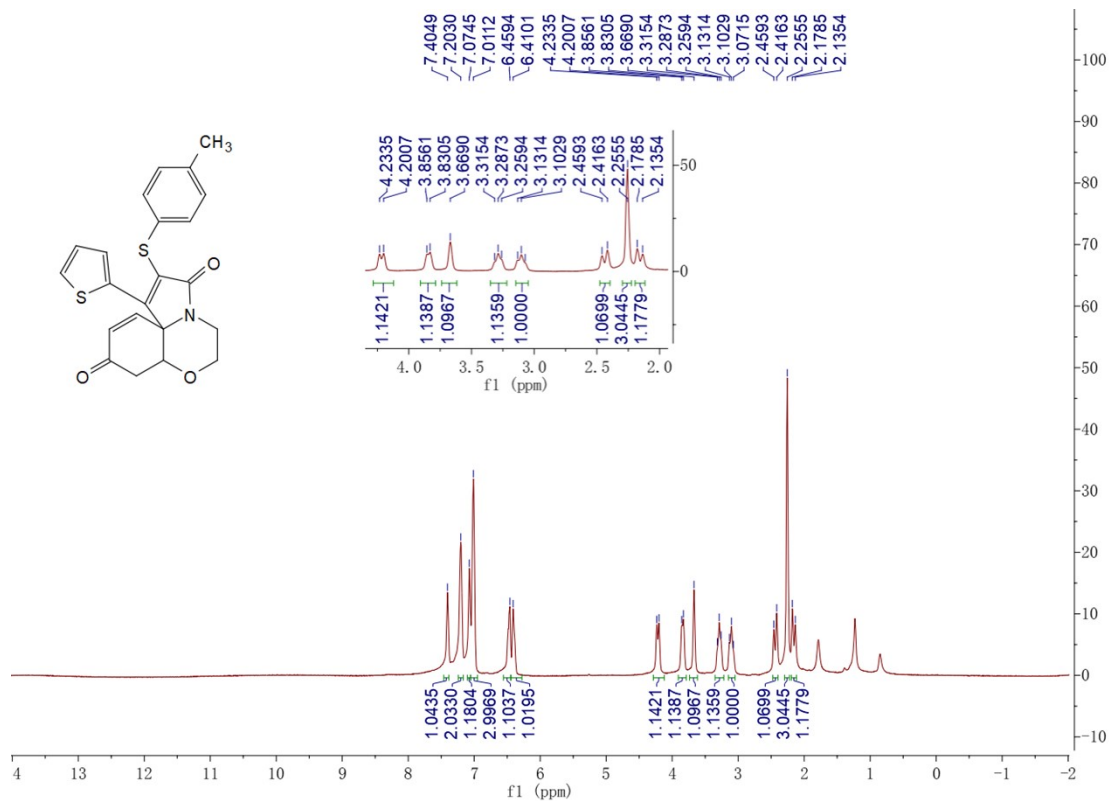

Figure S12  $^{13}\text{C}\{^1\text{H}\}$ -NMR spectrum (100 MHz,  $\text{CDCl}_3$ ) of **3f**

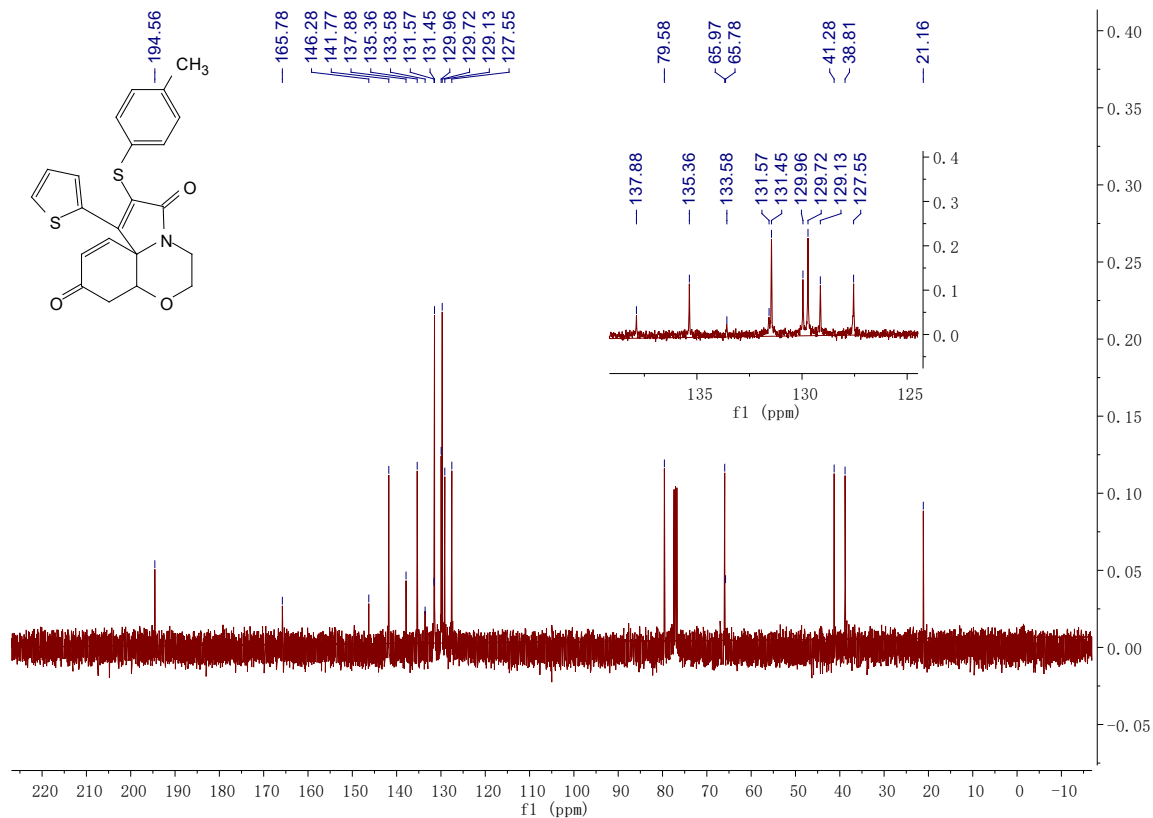

**Figure S13**  $^1\text{H-NMR}$  spectrum (400 MHz,  $\text{CDCl}_3$ ) of **3g**

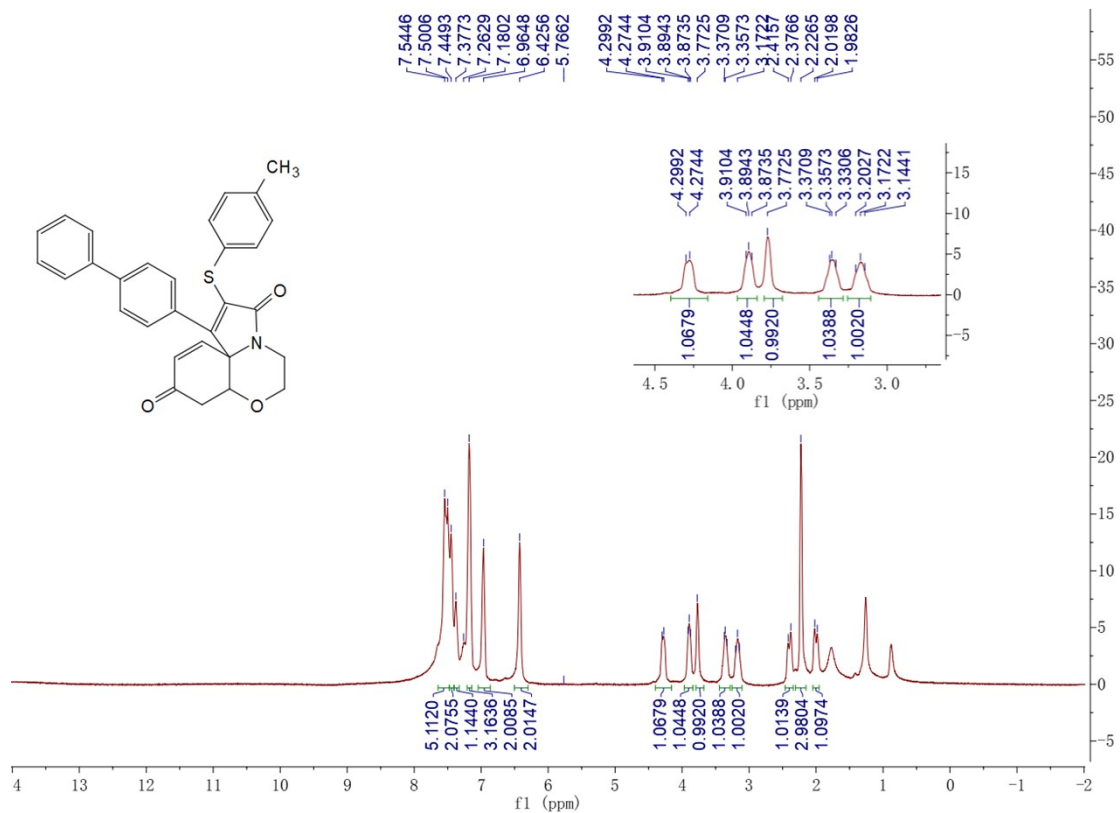

**Figure S14**  $^{13}\text{C}\{^1\text{H}\}$ -NMR spectrum (100 MHz,  $\text{CDCl}_3$ ) of **3g**

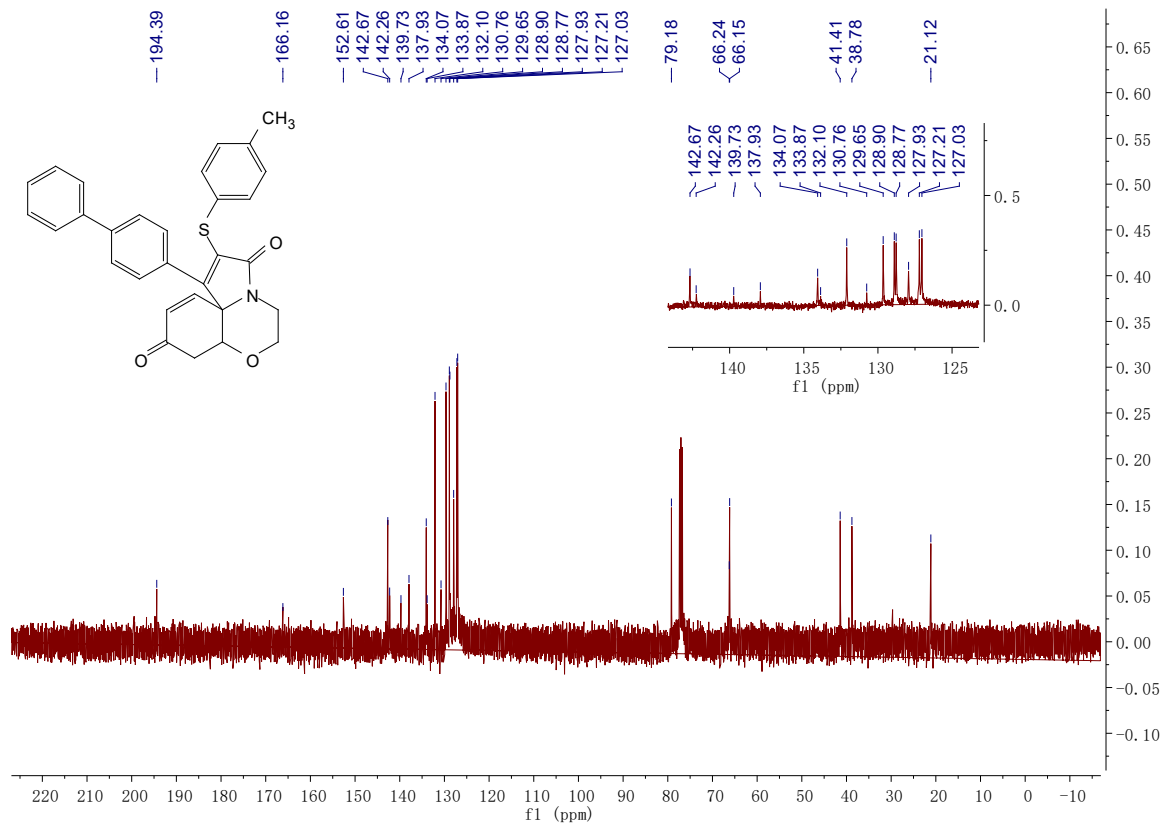

Figure S15  $^1\text{H-NMR}$  spectrum (400 MHz,  $\text{CDCl}_3$ ) of **3h**

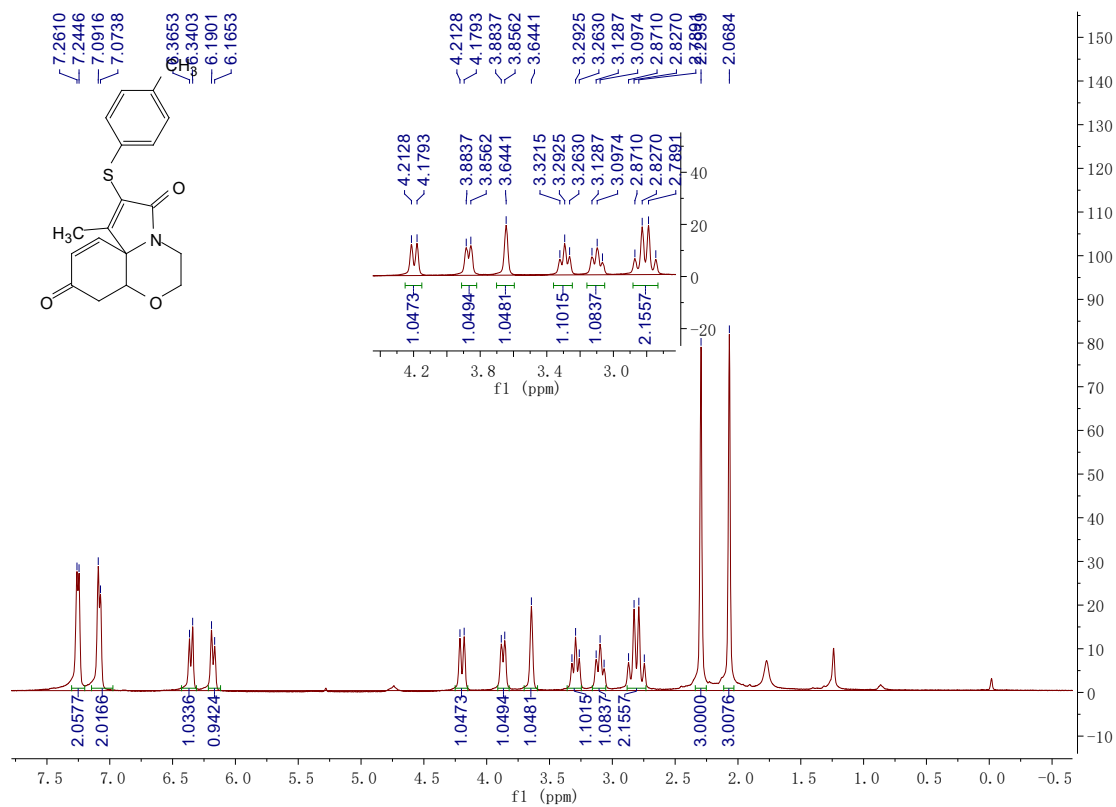

Figure S16  $^{13}\text{C}\{^1\text{H}\}$ -NMR spectrum (100 MHz,  $\text{CDCl}_3$ ) of **3h**

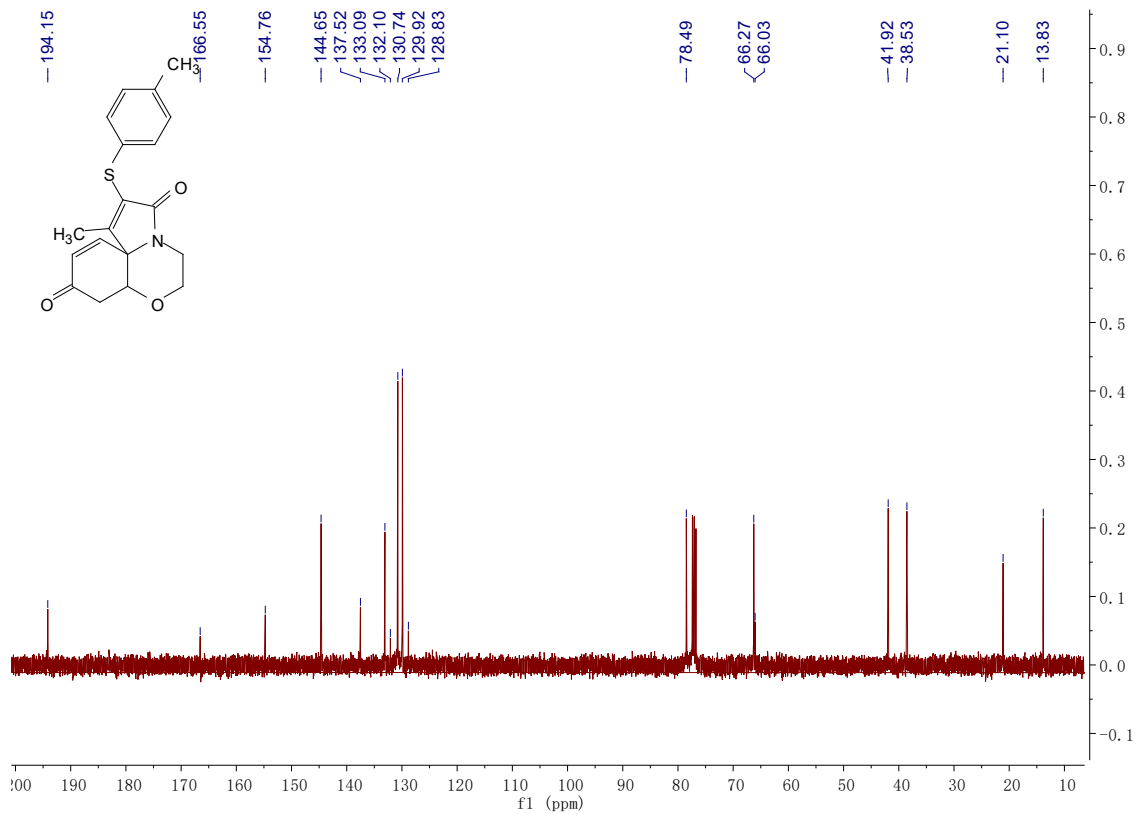

**Figure S17**  $^1\text{H-NMR}$  spectrum (400 MHz,  $\text{CDCl}_3$ ) of **3i**

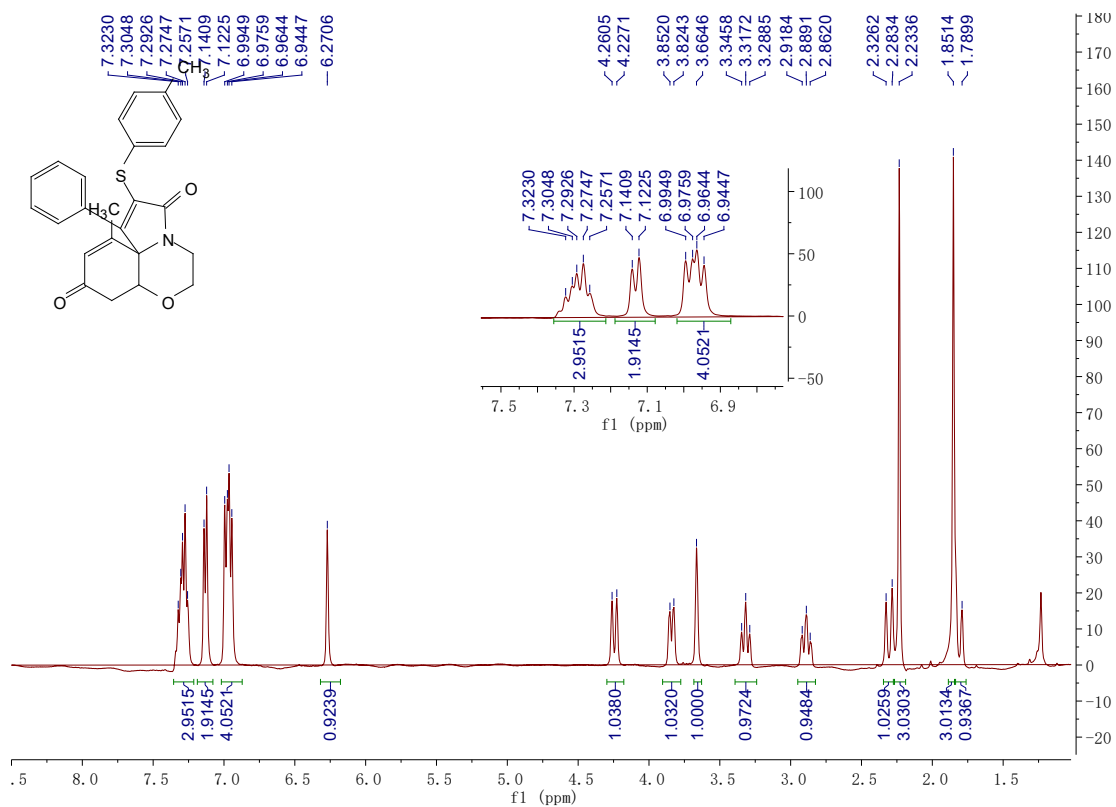

**Figure S18**  $^{13}\text{C}\{^1\text{H}\}$ -NMR spectrum (100 MHz,  $\text{CDCl}_3$ ) of **3i**

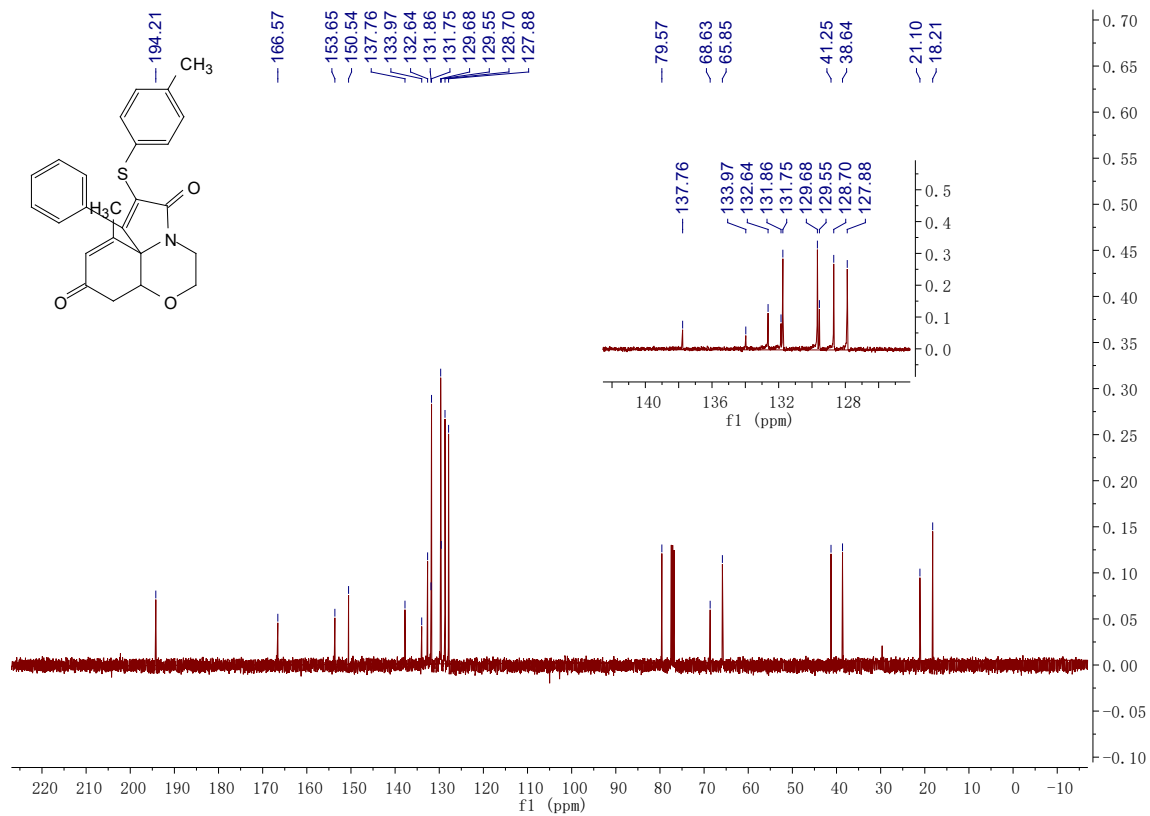

**Figure S19**  $^1\text{H-NMR}$  spectrum (400 MHz,  $\text{CDCl}_3$ ) of **3j**

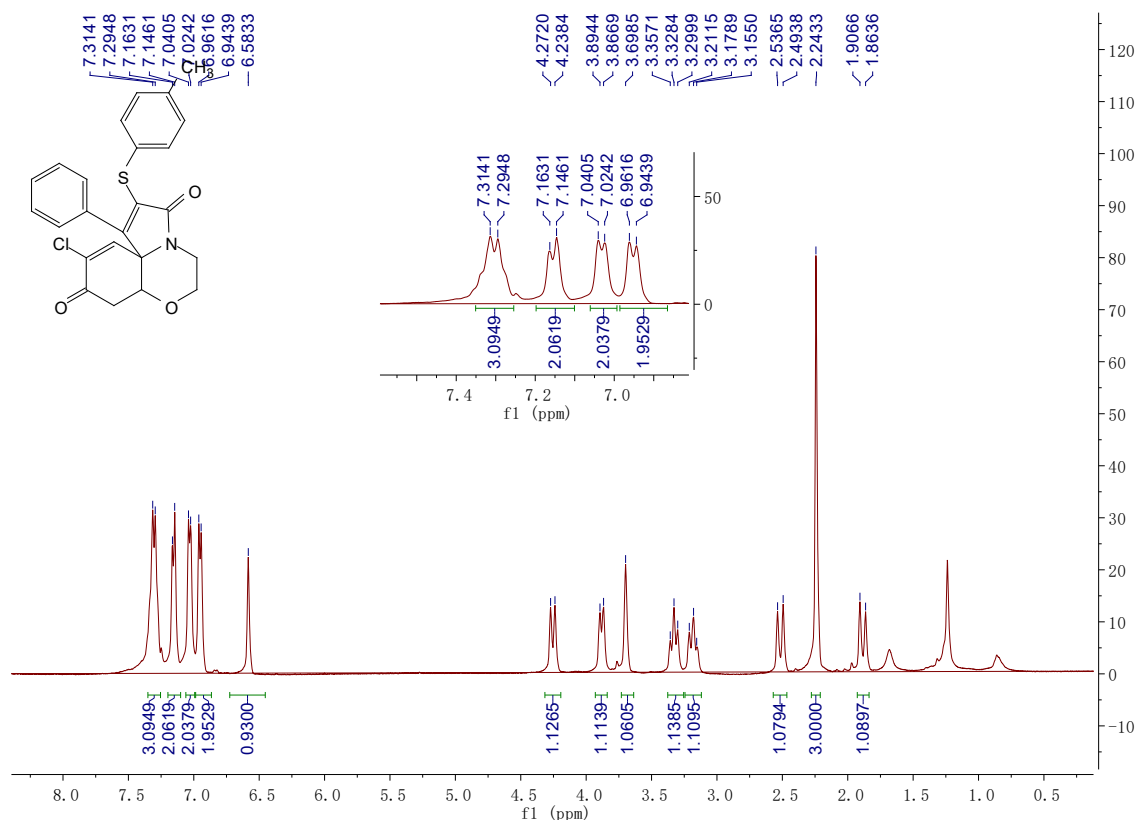

**Figure S20**  $^{13}\text{C}\{^1\text{H}\}$ -NMR spectrum (100 MHz,  $\text{CDCl}_3$ ) of **3j**

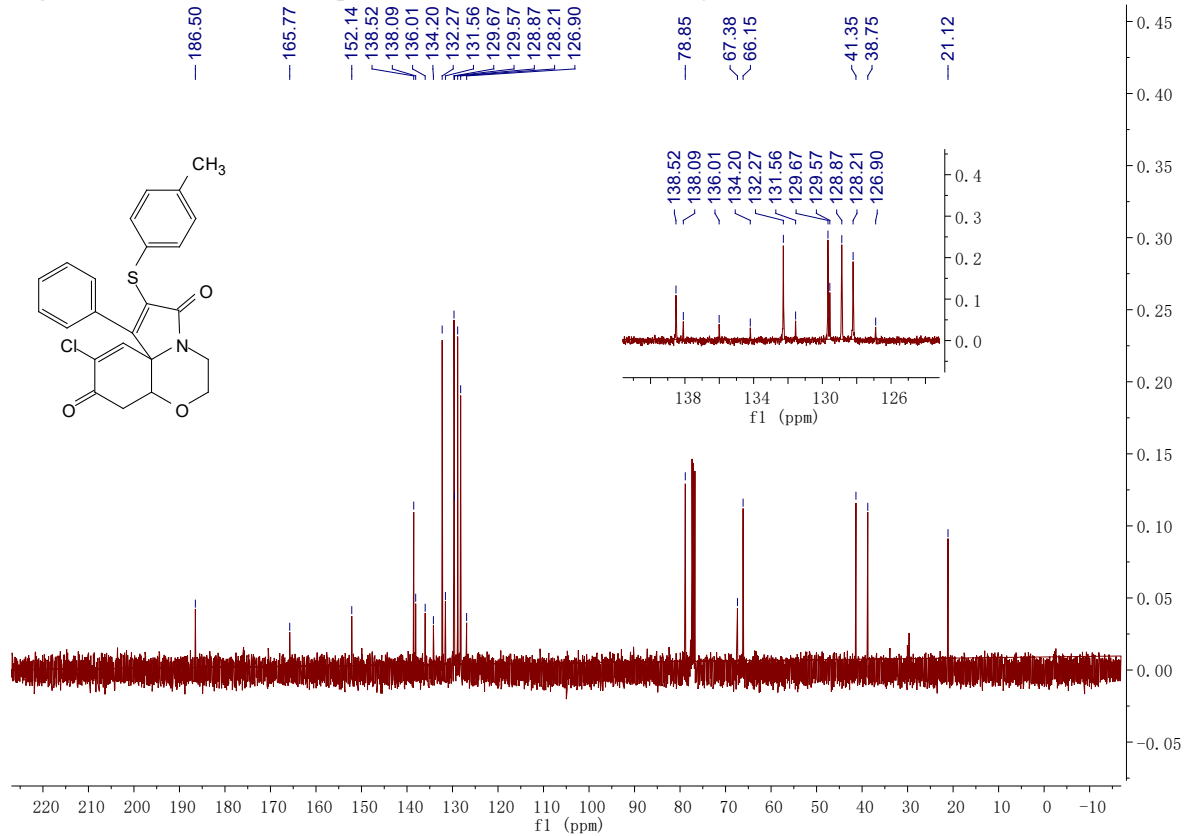



Figure S21 <sup>1</sup>H-NMR spectrum (400 MHz, CDCl<sub>3</sub>) of **3k**

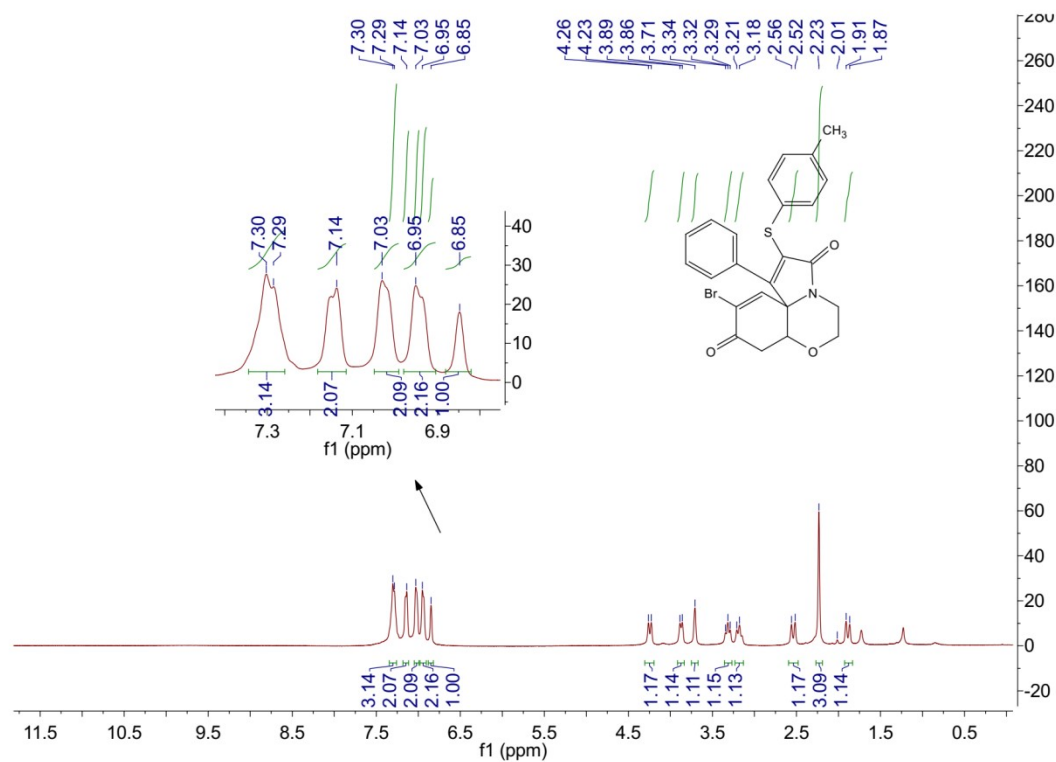

Figure S22 <sup>13</sup>C{<sup>1</sup>H}-NMR spectrum (100 MHz, CDCl<sub>3</sub>) of **3k**

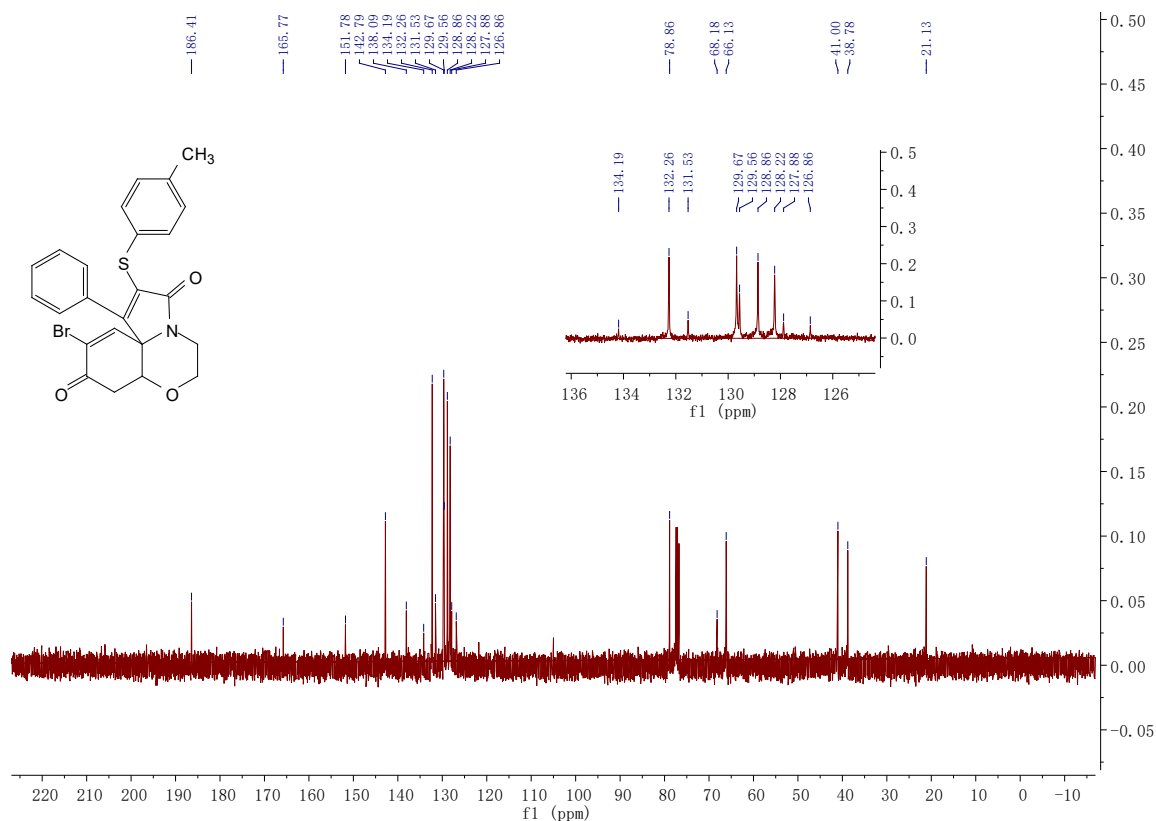

**Figure S23**  $^1\text{H-NMR}$  spectrum (400 MHz,  $\text{CDCl}_3$ ) of **31**

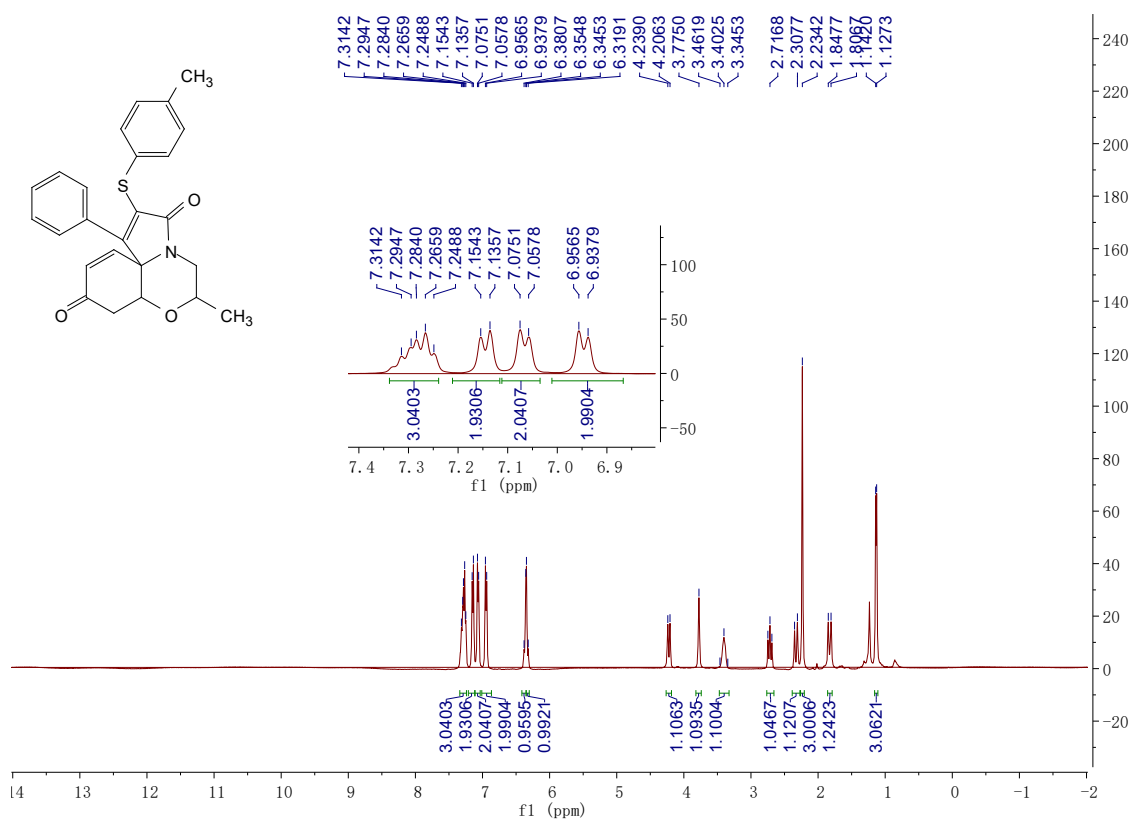

**Figure S24**  $^{13}\text{C}\{^1\text{H}\}$ -NMR spectrum (100 MHz,  $\text{CDCl}_3$ ) of **31**

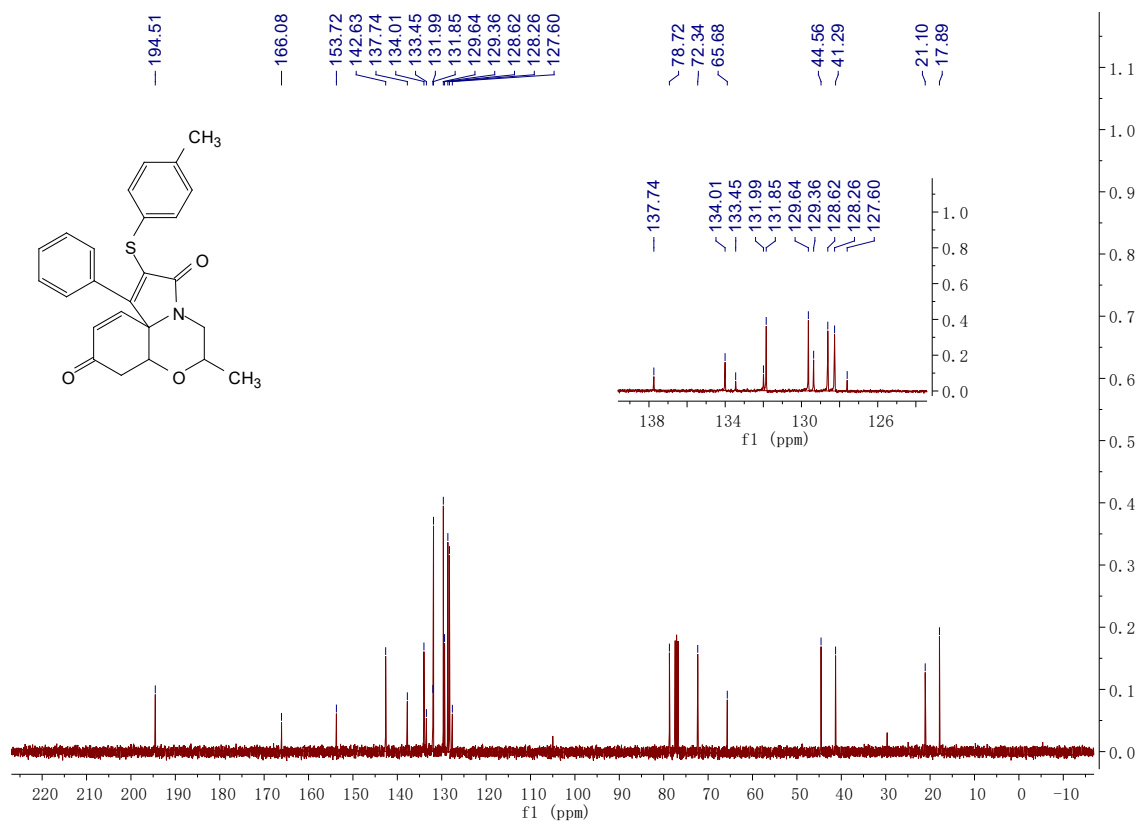

**Figure S25**  $^1\text{H-NMR}$  spectrum (400 MHz,  $\text{CDCl}_3$ ) of **3m**

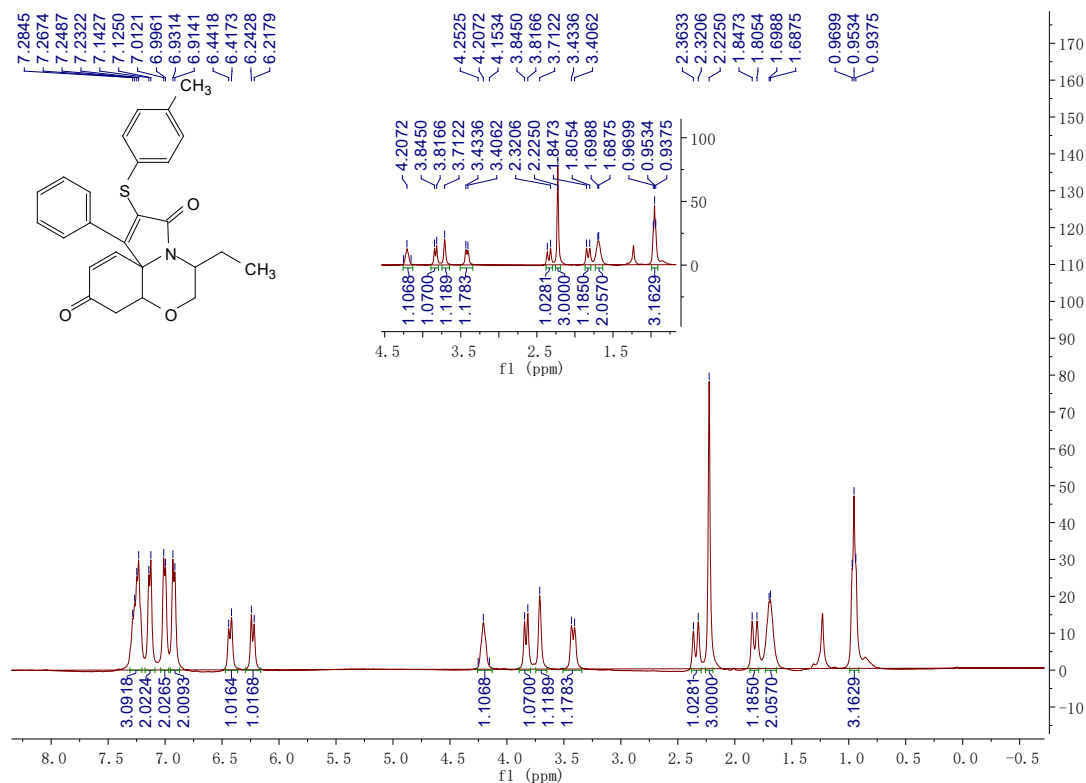

**Figure S26**  $^{13}\text{C}\{^1\text{H}\}$ -NMR spectrum (100 MHz,  $\text{CDCl}_3$ ) of **3m**

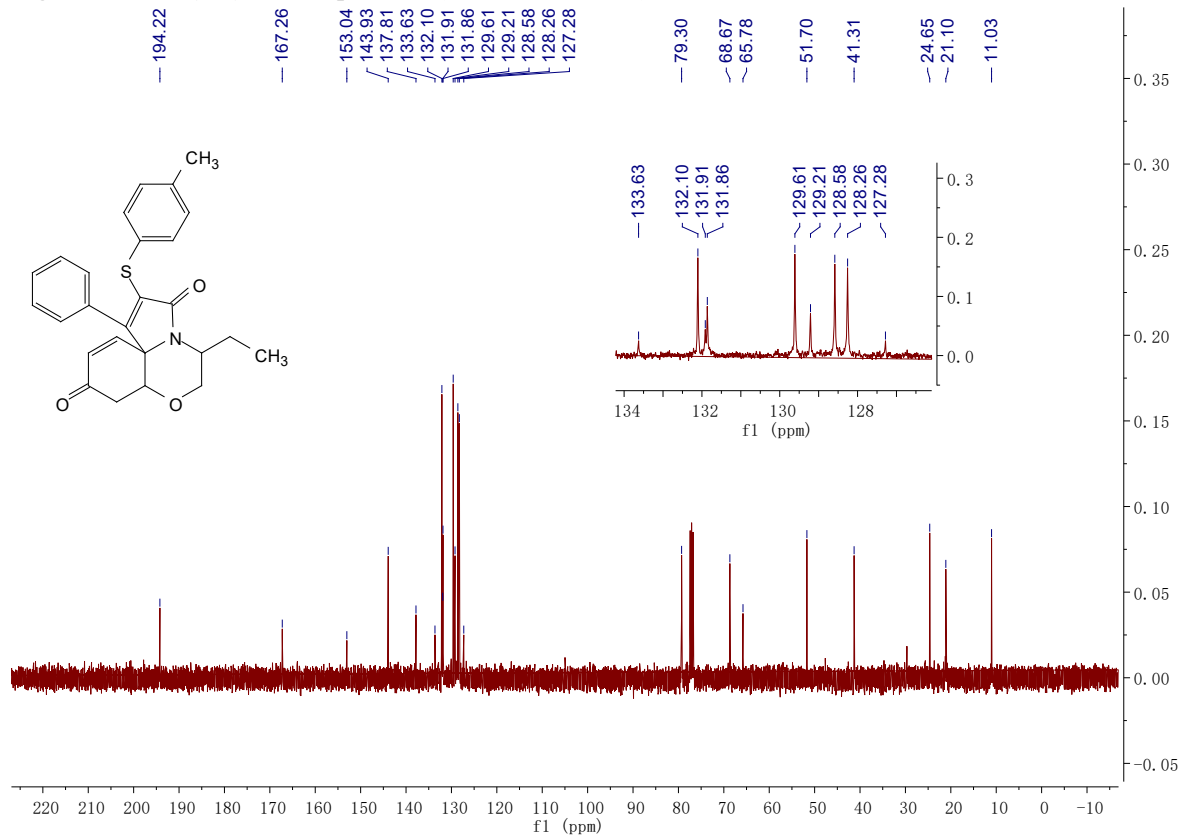

Figure S27 <sup>1</sup>H-NMR spectrum (400 MHz, CDCl<sub>3</sub>) of **3n**

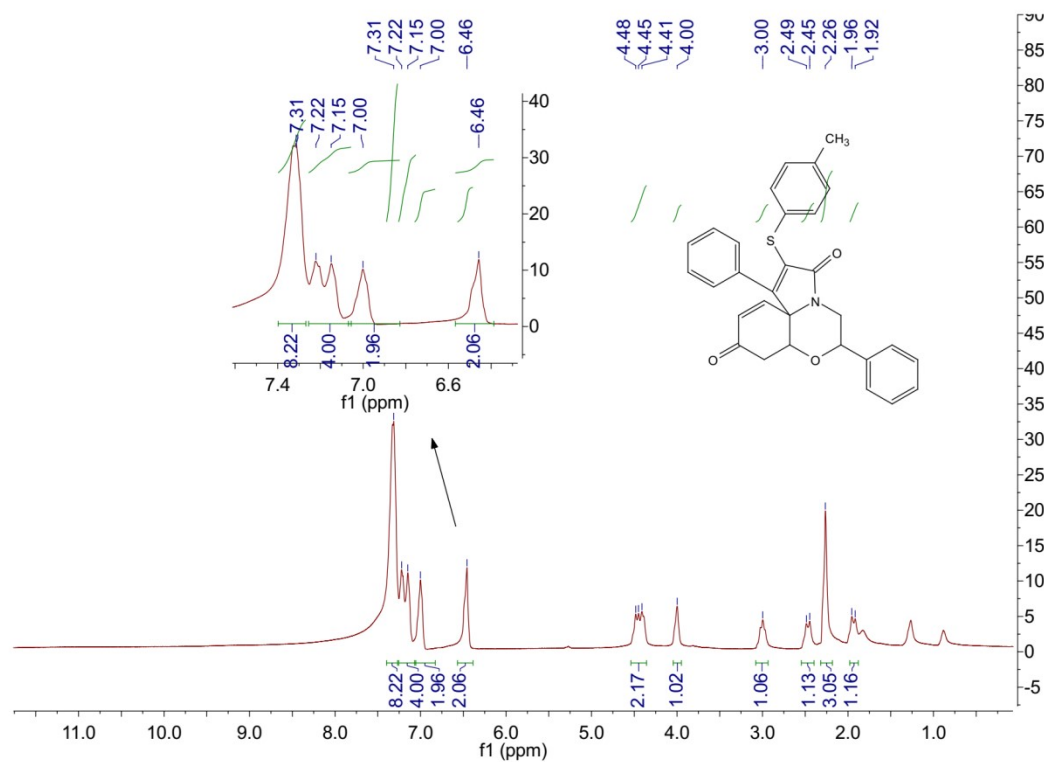

Figure S28 <sup>13</sup>C{<sup>1</sup>H}-NMR spectrum (100 MHz, CDCl<sub>3</sub>) of **3n**

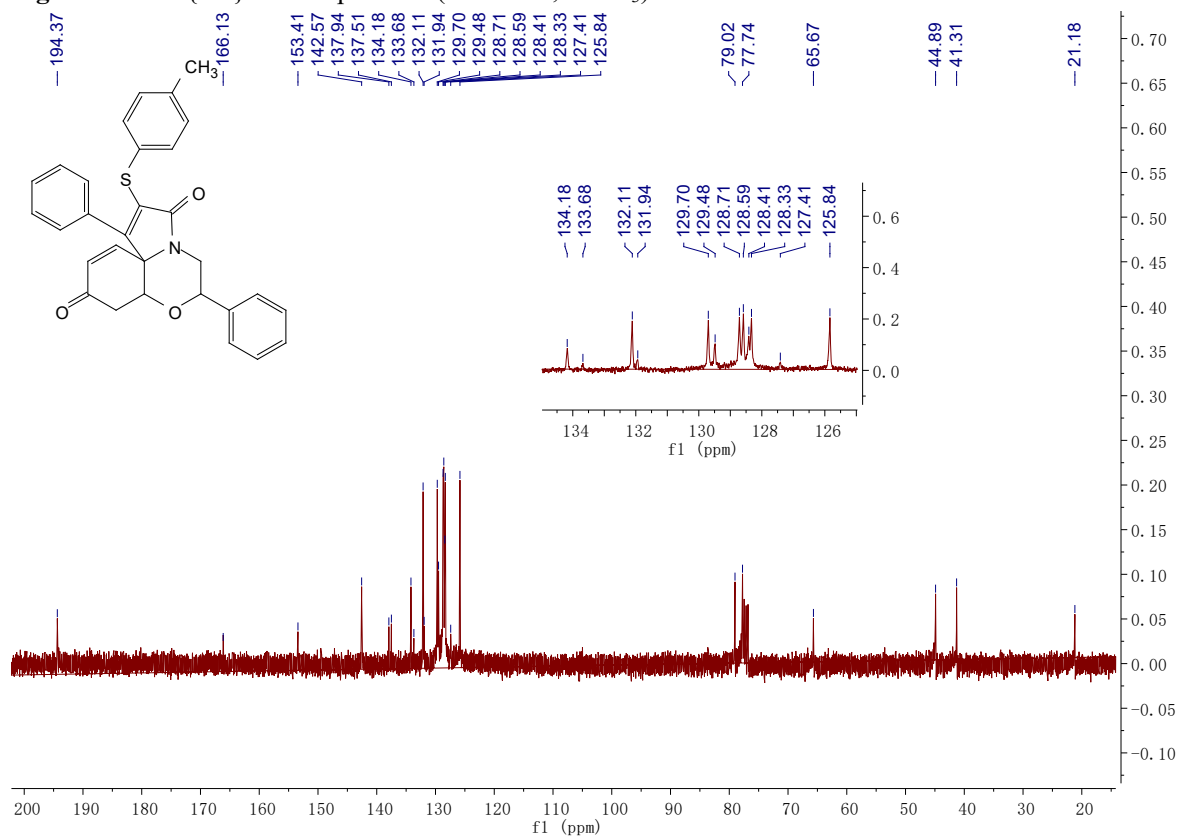

**Figure S29**  $^1\text{H-NMR}$  spectrum (400 MHz,  $\text{CDCl}_3$ ) of **3o**

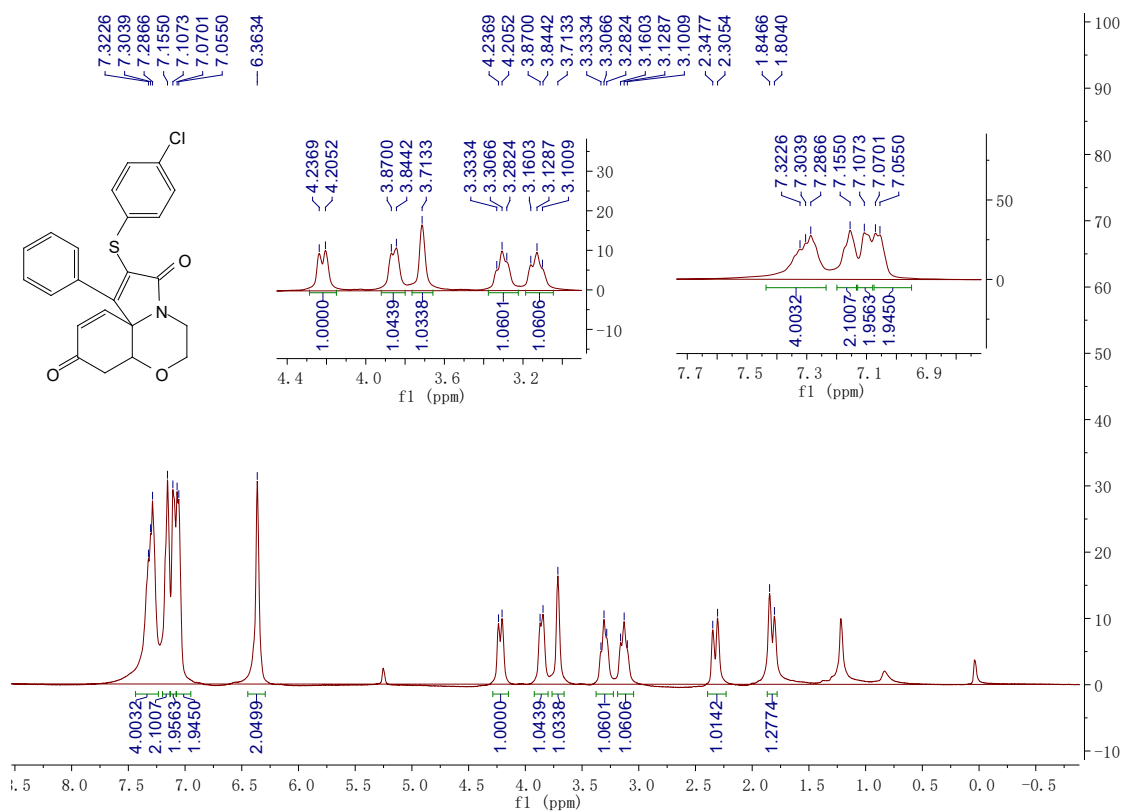

**Figure S30**  $^{13}\text{C}\{^1\text{H}\}$ -NMR spectrum (100 MHz,  $\text{CDCl}_3$ ) of **3o**

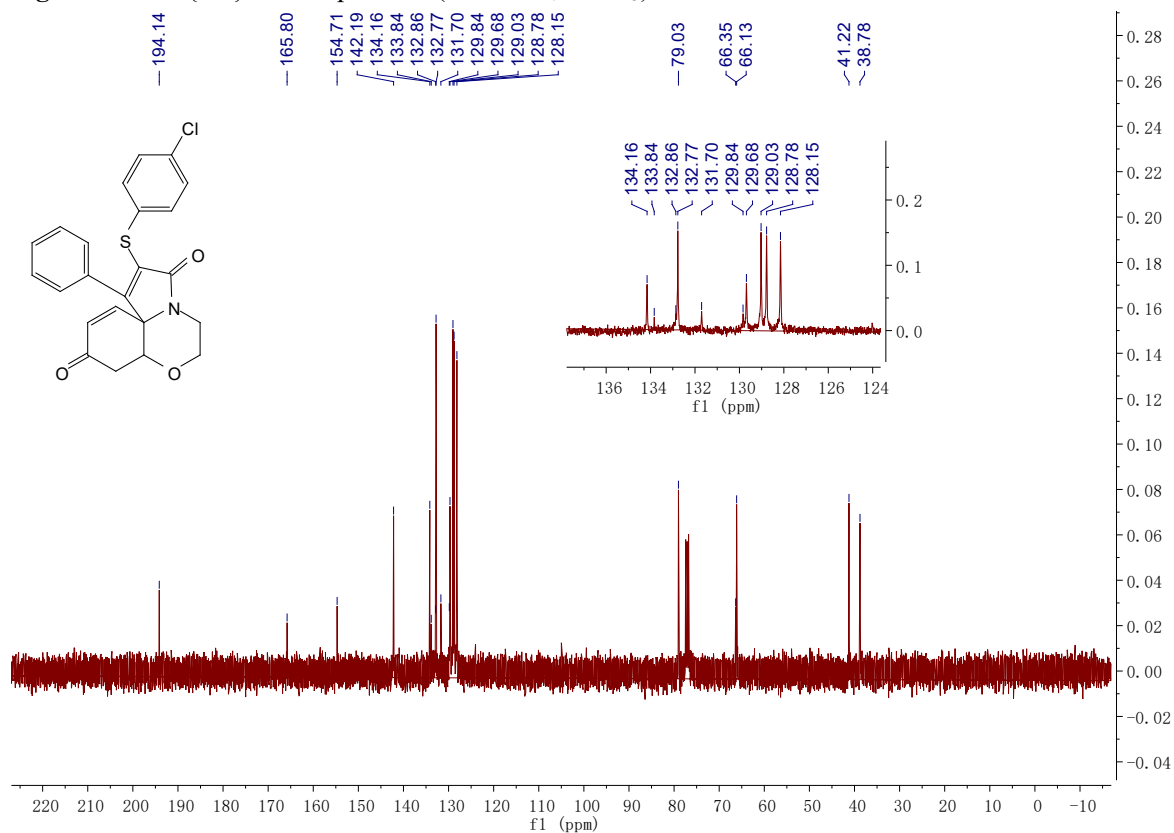

Figure S31  $^1\text{H-NMR}$  spectrum (400 MHz,  $\text{CDCl}_3$ ) of **3p**

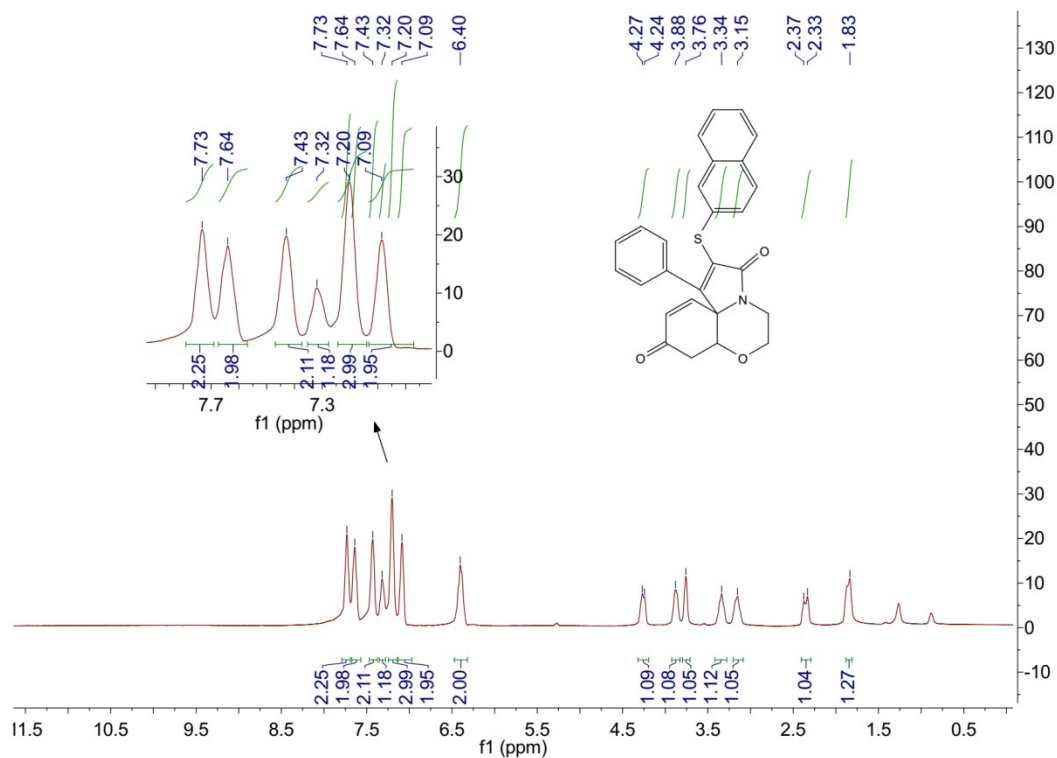

Figure S32  $^{13}\text{C}\{^1\text{H}\}$ -NMR spectrum (100 MHz,  $\text{CDCl}_3$ ) of **3p**

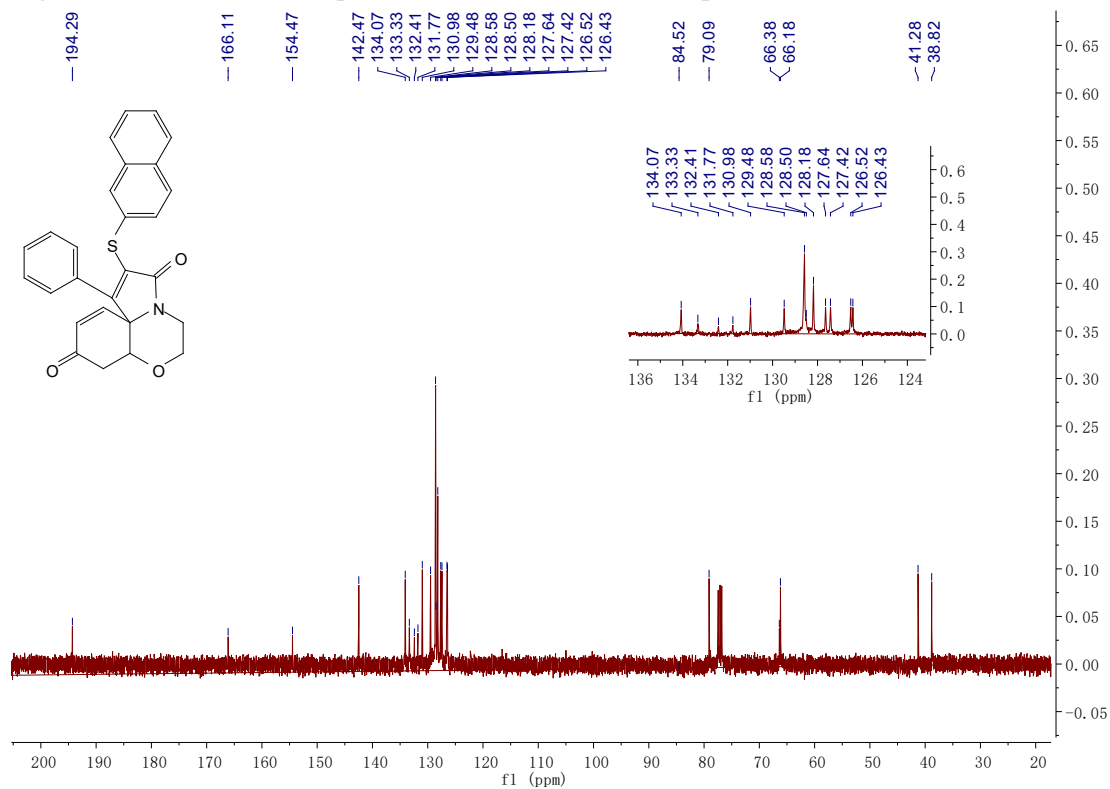

**Figure S33**  $^1\text{H-NMR}$  spectrum (400 MHz,  $\text{CDCl}_3$ ) of **3q**

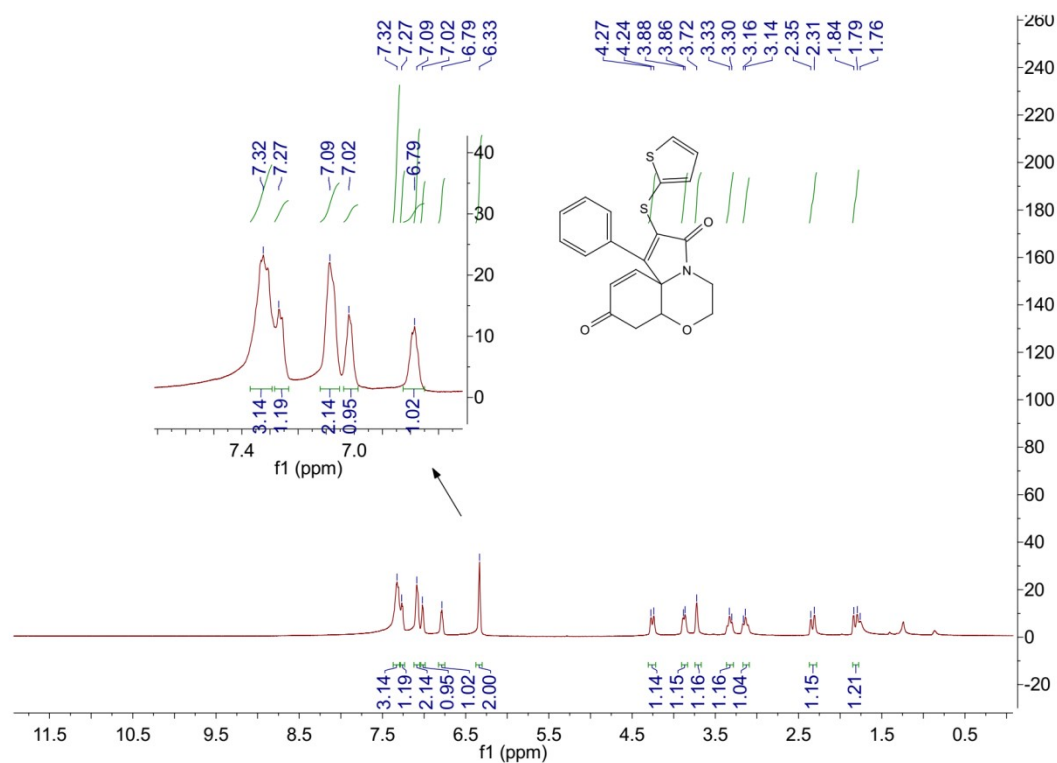

**Figure S34**  $^{13}\text{C}\{^1\text{H}\}$ -NMR spectrum (100 MHz,  $\text{CDCl}_3$ ) of **3q**

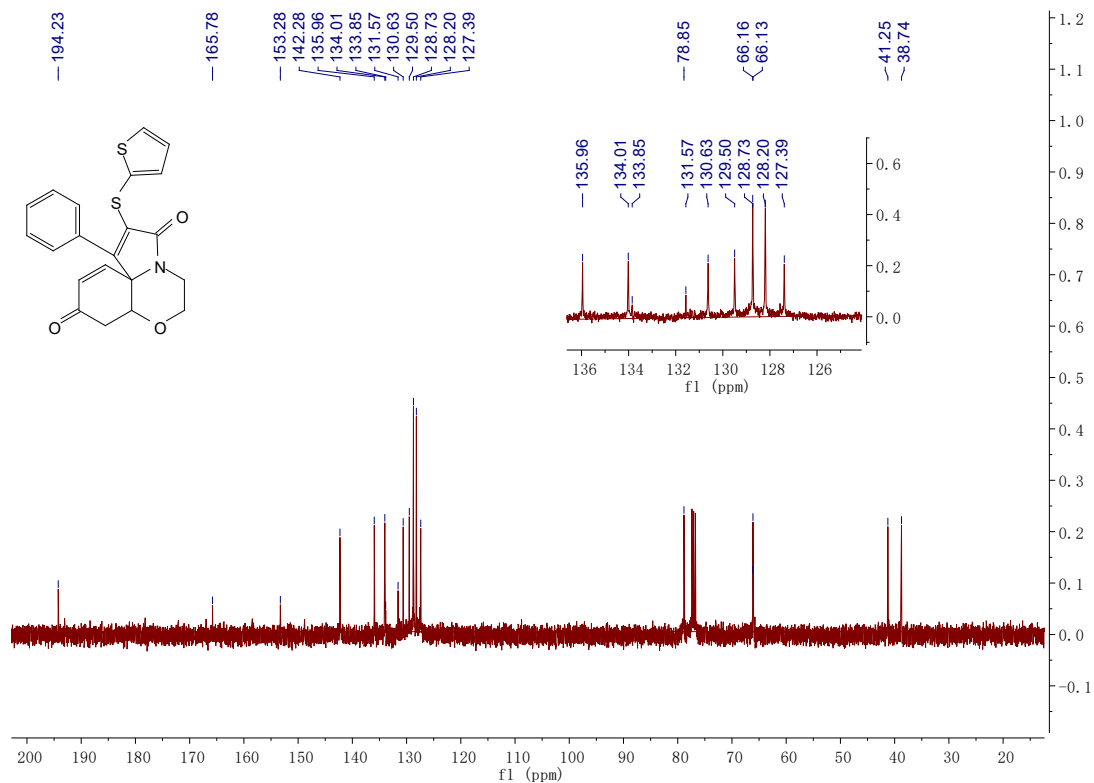

Figure S35  $^1\text{H-NMR}$  spectrum (400 MHz,  $\text{CDCl}_3$ ) of **3r**

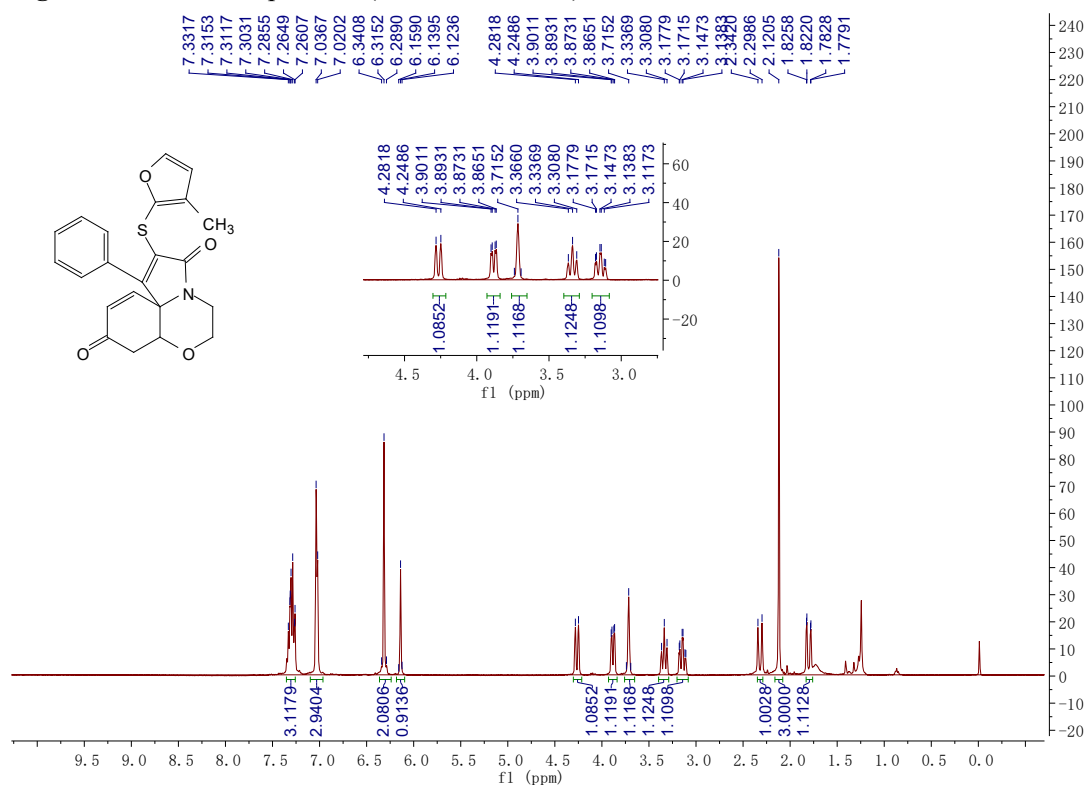

Figure S36  $^{13}\text{C}\{^1\text{H}\}$ -NMR spectrum (100 MHz,  $\text{CDCl}_3$ ) of **3r**

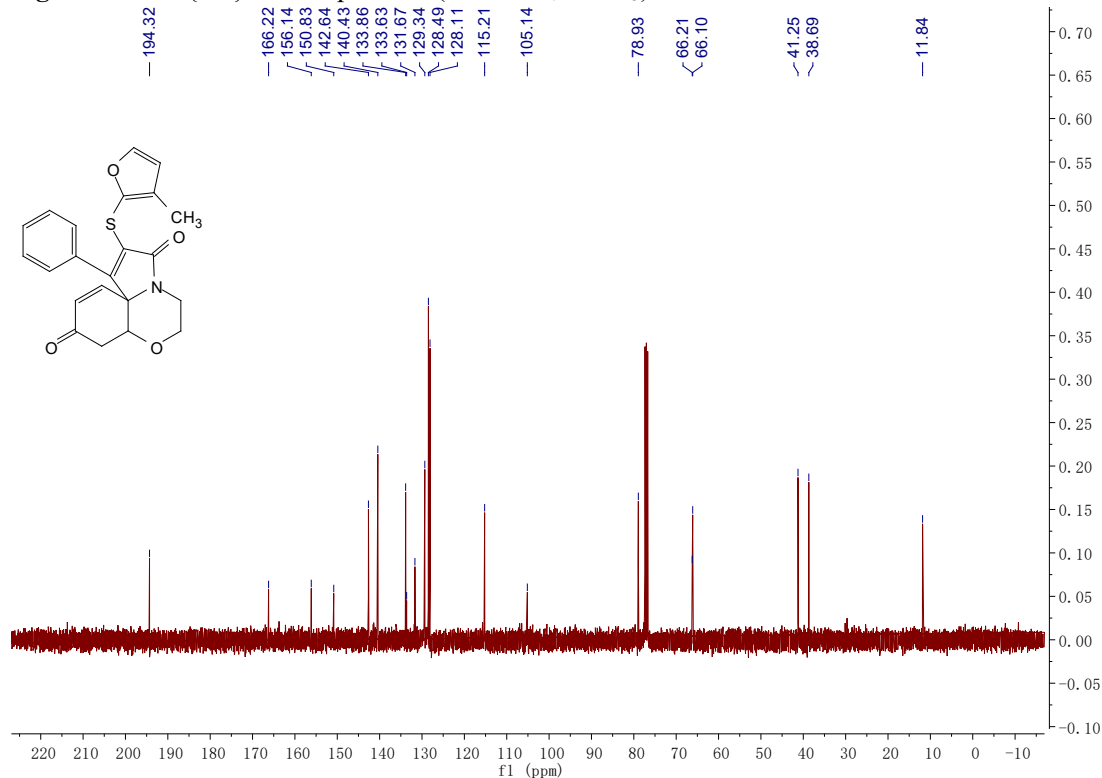



**Figure S37**  $^1\text{H-NMR}$  spectrum (400 MHz,  $\text{CDCl}_3$ ) of **3s**

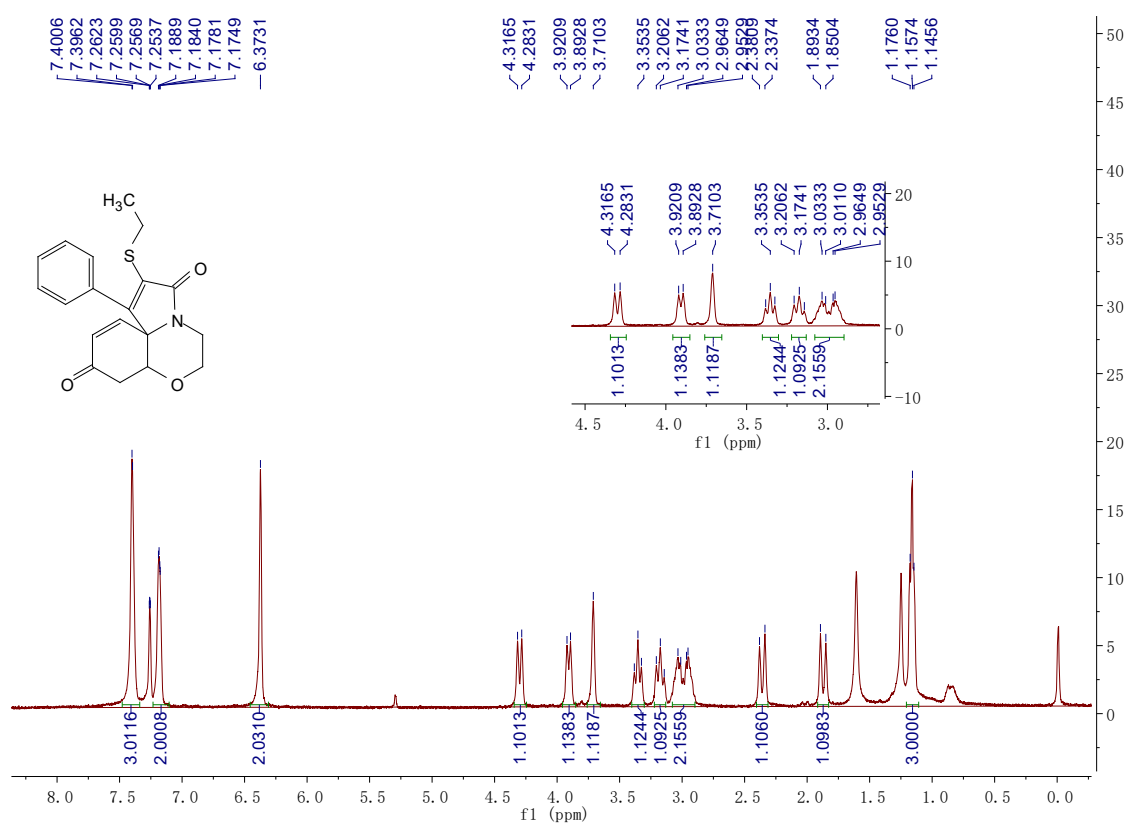

**Figure S38**  $^{13}\text{C}\{^1\text{H}\}$ -NMR spectrum (100 MHz,  $\text{CDCl}_3$ ) of **3s**

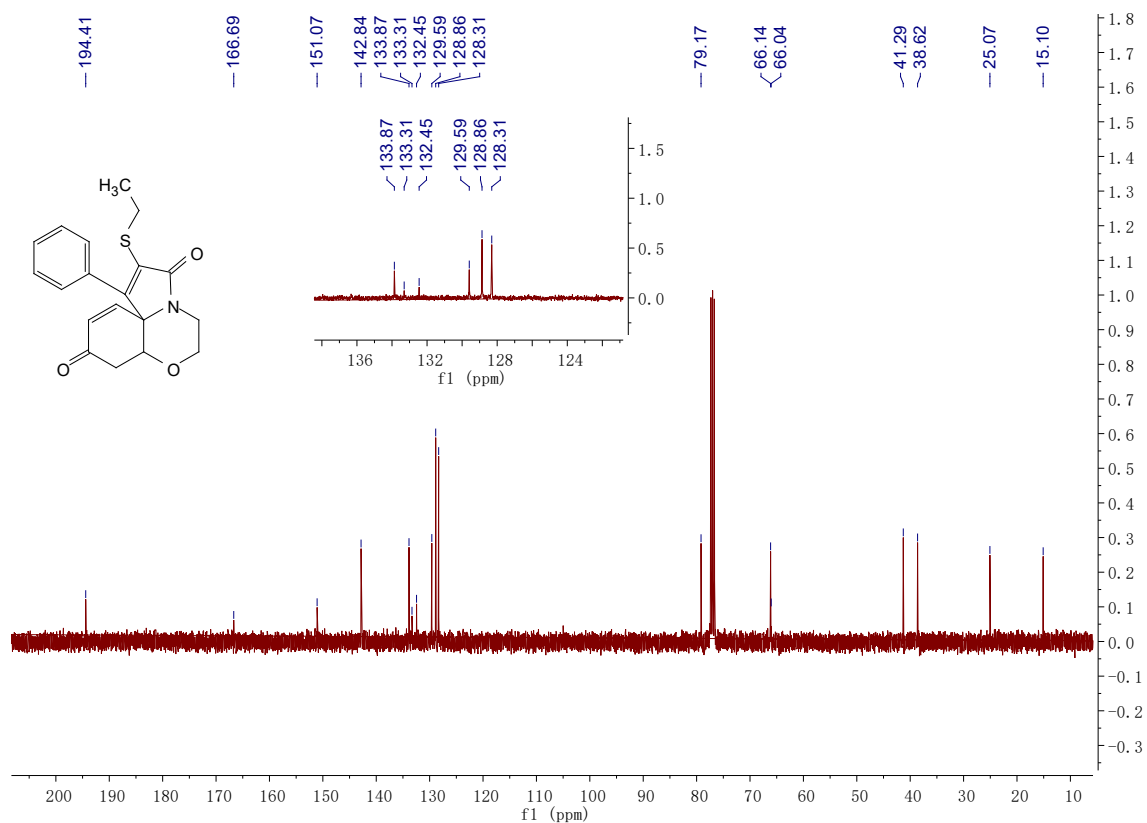

**Figure S39**  $^1\text{H-NMR}$  spectrum (400 MHz,  $\text{CDCl}_3$ ) of **3t**

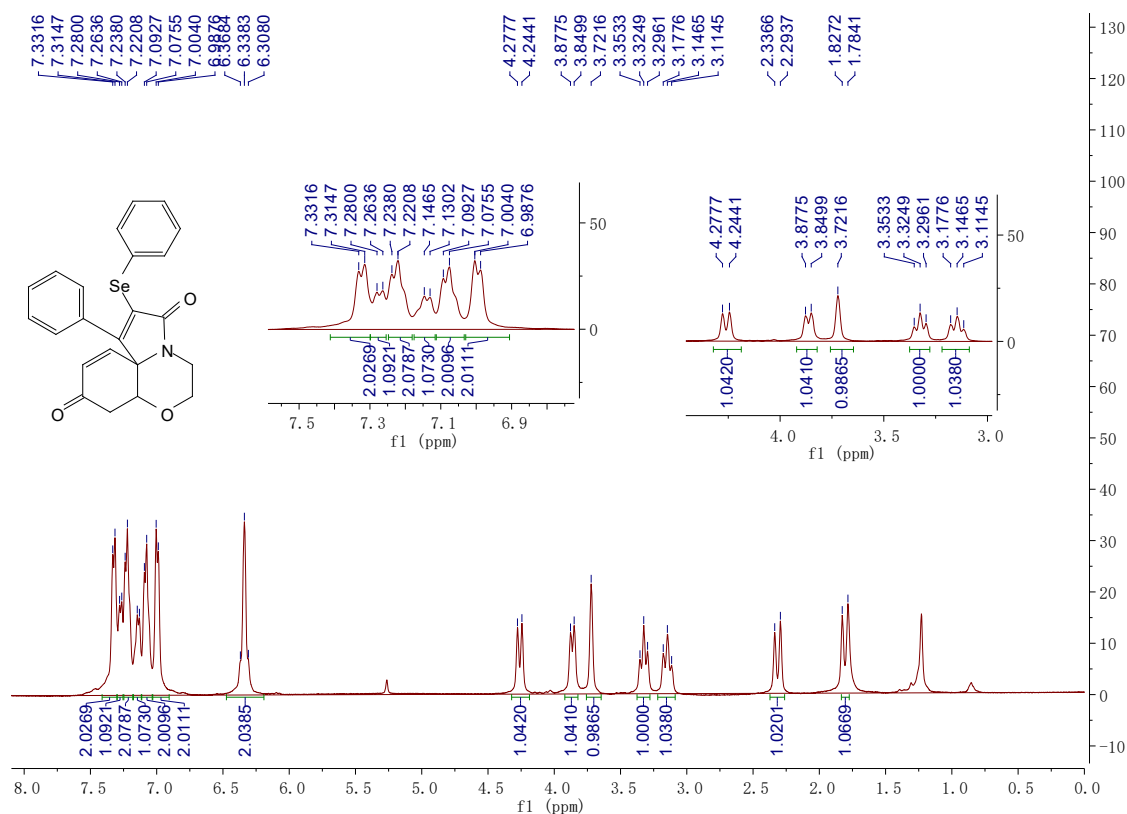

**Figure S40**  $^{13}\text{C}\{^1\text{H}\}$ -NMR spectrum (100 MHz,  $\text{CDCl}_3$ ) of **3t**

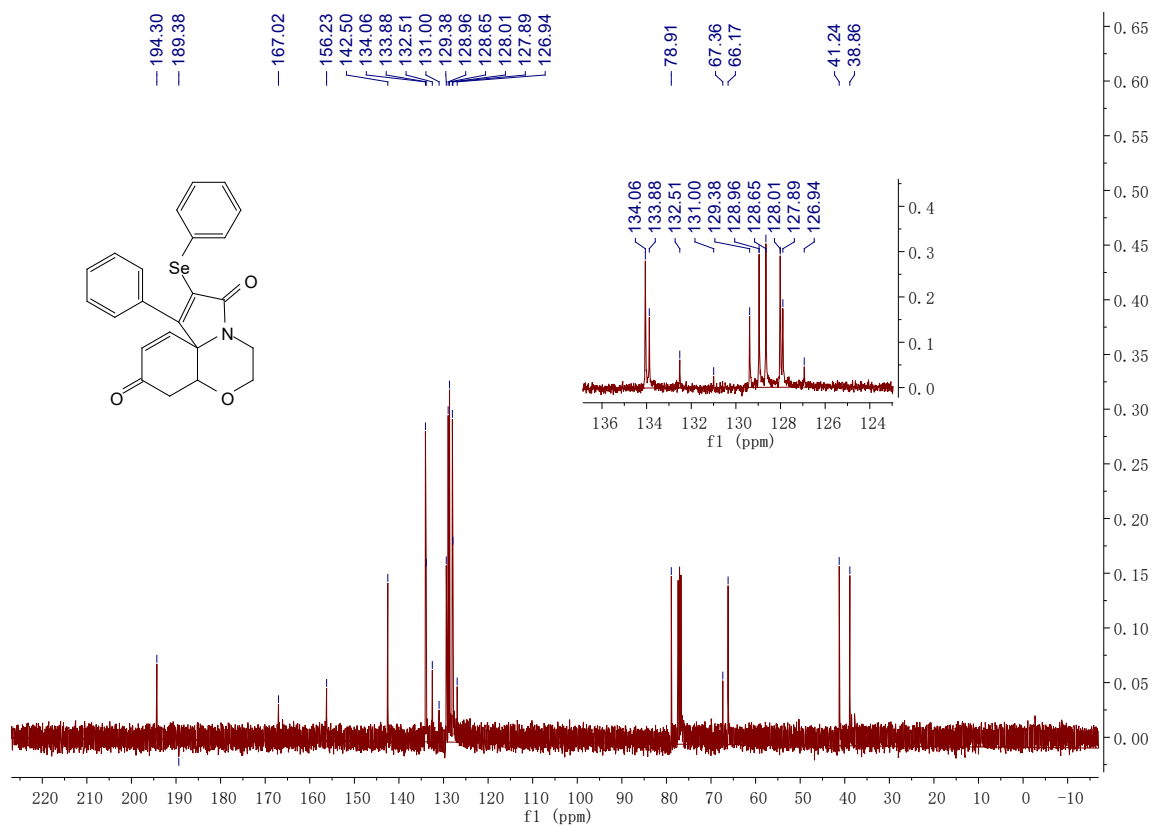



**Figure S43**  $^1\text{H-NMR}$  spectrum (400 MHz,  $\text{CDCl}_3$ ) of **3v**

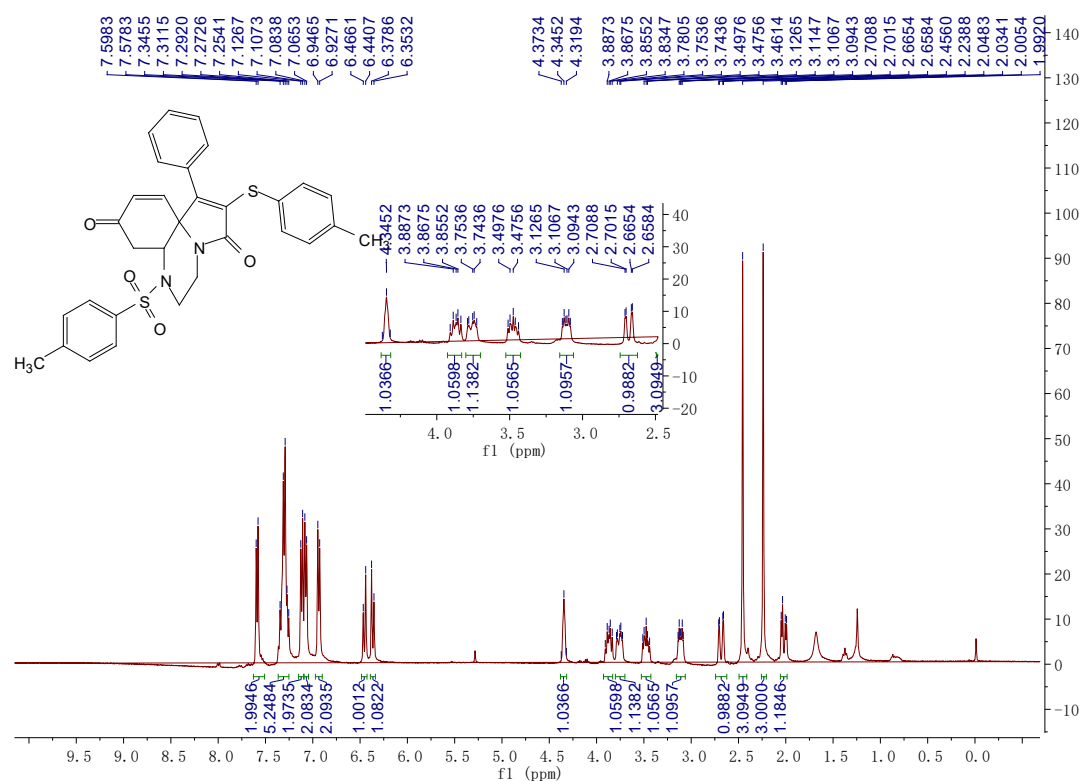

**Figure S44**  $^{13}\text{C}\{^1\text{H}\}$ -NMR spectrum (100 MHz,  $\text{CDCl}_3$ ) of **3v**

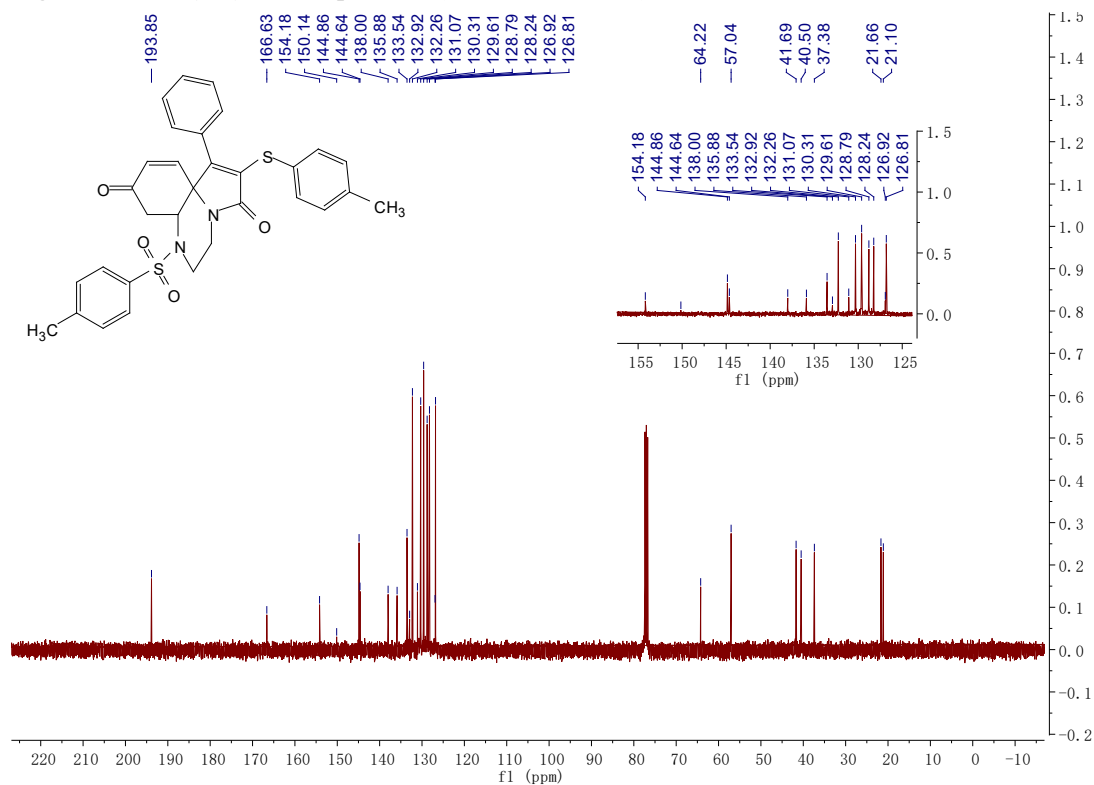

Supplement: d3ra02247a1.pdf [file d3ra02247a1.pdf]
